# Supplementary material for: Multiplexed Targeted Spatial Mass Spectrometry Imaging Assays to monitor lipids and NAD+ metabolites in CD38 knockout mice exhibiting improved metabolism
Source: Research Square preprint supplement (doi:10.21203/rs.3.rs-6743284/v1), 2025-06-16
Supplement: Supplementary file 3 [file 38aa66ed4ca0a639915c1210.xlsx]

## Sheet: Supplemental_Table_1
Supplemental Table 1: iprm-PASEF isolation settings for targeted analytes
m/z	Interval Width (+/- Da)	1/K0 begin	1/K0 end	Mobility Interval Width (+/- 1/K0)	Name	Notation
540.05	0.00319764	1.0039	1.0234	0.00975	Cyclic Adenosine Diphosphate Ribose (cADPr)	[M-H]-
558.07	0.00320277	1.0034	1.0229	0.00975	Adenosine Diphosphate Ribose (ADPr)	[M-H]-
857.519	0.0049213	1.4188	1.4385	0.00985	PI(16:0/20:4)	[M-H]-
859.53	0.00493284	1.4222	1.4418	0.0098	PI(18:1/18:2) + PI(16:0/20:3)	[M-H]-
885.55	0.00494439	1.46025	1.47975	0.00975	PI(18:0/20:4)	[M-H]-
664.12	0.00406203	1.1224	1.14	0.0088	Nicotinamide adenine dinucleotide (NAD+)	[M+H]+
