# Supplementary material for: Multiplexed Targeted Spatial Mass Spectrometry Imaging Assays to monitor lipids and NAD+ metabolites in CD38 knockout mice exhibiting improved metabolism
Source: Research Square preprint supplement (doi:10.21203/rs.3.rs-6743284/v1), 2025-06-16
Supplement: Supplementary file 5 [file 7d8e15fc40580d7ad6509158.xlsx]

## Sheet: Supplemental_Table_3A
Supplemental Table 3: Quantification and Statistical Analysis of NAD Fragment Ions
Statistical analysis for multiple fragment ions of NAD+ [M+H]+ precursor ion at m/z 664.12 & Vs/cm2 1.1224-1.1400
	Fragment ion m/z:	m/z 136.06			m/z 232.08			m/z 348.07			m/z 428.04
	Genotype:	WT	CD38-/-		WT	CD38-/-		WT	CD38-/-		WT	CD38-/-
	Average:	2.53837	41.216		0.780495	15.2296		0.587555	12.7066		2.8073	59.5686
	Standard error of the mean:	0.255152	1.00219		0.134437	0.59322		0.115674	0.545721		0.243646	1.34312
	Fold-change CD38-/- vs WT:	16.2372			19.5128			21.6262			21.2192
	Student's t-test p-value	< 0.0001			< 0.0001			< 0.0001			< 0.0001

## Sheet: Supplemental_Table_3B
Supplemental Table 3: Quantification and Statistical Analysis of NAD Fragment Ions
Individual pixel intensities for multiple fragment ions of NAD+ [M+H]+ precursor ion at m/z 664.12 & Vs/cm2 1.1224-1.1400
	Fragment ion m/z:	m/z 136.06			m/z 232.08			m/z 348.07			m/z 428.04
	Genotype:	WT	CD38-/-		WT	CD38-/-		WT	CD38-/-		WT	CD38-/-
	Individual Pixel Values:	15.295	94.0928		0	61.3242		0	0		0	93.1566
		0	33.4247		0	0		0	39.502		0	183.076
		0	87.1376		0	25.0455		0	0		0	72.0059
		0	129.783		0	60.671		0	0		0	63.8365
		17.88	172.712		0	0		0	61.5214		0	91.4355
		0	69.0085		0	33.3541		0	0		0	97.187
		0	168.784		0	15.6171		0	0		0	99.7089
		0	130.943		0	67.2412		0	0		0	123.36
		3.78616	38.6088		0	24.5692		0	109.392		0	0
		0	65.5147		0	16.9308		0	0		0	97.9039
		0	71.1114		0	0		0	79.8326		0	57.0233
		0	0		0	61.7048		0	0		0	170.53
		0	0		0	60.4377		0	0		0	128.526
		0	0		0	0		0	0		0	0
		0	34.8235		0	65.5502		0	19.1188		0	47.797
		0	79.6543		0	0		0	0		0	70.0574
		36.6531	35.0127		0	0		0	0		0	0
		0	0		0	21.7282		0	0		0	0
		4.04115	0		0	0		0	0		0	54.251
		0	62.2412		0	0		0	0		0	93.7557
		0	0		0	0		0	59.9499		0	86.5942
		0	58.0848		0	58.0848		0	59.8449		0	208.284
		0	98.87		0	0		0	0		0	38.6643
		0	53.0664		0	0		0	0		0	0
		0	128.306		0	0		0	32.6201		0	42.7686
		0	0		34.4376	0		0	0		0	0
		0	0		0	41.1155		0	32.6089		0	0
		0	127.882		0	80.3586		0	36.291		0	44.9317
		0	26.208		0	99.0081		0	49.5041		41.9877	146.328
		0	74.1017		0	0		0	17.9079		0	52.4887
		0	0		0	0		0	55.1903		0	136.471
		53.8376	0		0	0		0	0		0	0
		20.1076	77.7085		0	0		0	11.235		0	45.8761
		0	0		0	46.5362		0	20.8938		0	78.8266
		0	81.0775		0	28.0653		0	0		0	137.208
		0	47.2092		0	0		0	0		0	97.5656
		0	0		0	0		0	0		0	41.4453
		0	0		0	26.1797		0	0		0	25.4097
		0	29.2085		0	57.5579		0	24.9131		0	0
		0	33.1109		0	0		0	0		0	85.0496
		0	0		0	0		0	68.8626		34.2501	63.6325
		48.3766	0		0	23.8947		0	16.5935		0	33.1871
		0	59.8006		0	0		0	0		0	0
		0	0		0	0		0	0		18.4405	95.1157
		0	38.8442		0	0		0	33.4864		0	42.8626
		0	42.696		0	18.0637		0	0		0	0
		0	0		0	0		0	0		47.4797	169.28
		0	77.9777		0	18.4311		0	0		0	56.0022
		0	88.868		0	0		0	0		0	0
		86.1282	6.11071		0	0		0	4.3648		0	115.231
		27.2871	98.9345		0	0		29.4996	0		22.1247	26.5003
		0	36.1194		0	31.5084		0	0		0	177.523
		0	33.3917		0	60.3204		0	0		0	0
		0	123.743		0	103.676		0	0		0	0
		0	140.675		0	0		0	38.585		0	76.3662
		0	75.5999		0	16.6458		0	0		39.269	65.1962
		0	22.1432		0	0		0	0		0	151.185
		0	22.133		0	15.9357		0	86.7612		0	0
		0	54.1274		0	0		0	0		0	58.6381
		39.3243	0		44.3445	0		0	0		0	119.584
		0	50.9431		0	69.0754		0	0		0	50.9431
		0	128.388		0	0		0	0		24.7329	135.521
		0	66.0918		37.7745	31.8796		0	0		45.869	52.8734
		0	0		0	0		0	0		0	33.9231
		0	86.596		0	0		0	25.1128		0	35.5044
		0	35.7045		0	0		0	0		0	0
		55.7441	0		0	0		0	0		0	131.342
		0	58.5144		0	46.4299		0	54.0622		0	62.3306
		0	55.5557		0	19.0477		0	0		0	173.016
		0	64.7701		0	37.702		0	0		0	112.139
		0	0		0	126.884		0	76.8995		0	0
		0	0		0	0		0	0		0	0
		0	85.7465		0	0		0	39.2399		0	23.2533
		0	70.58		0	27.7279		0	61.3374		0	89.0653
		0	0		0	0		0	35.3218		0	134.062
		0	0		0	0		0	0		0	0
		0	0		0	0		0	0		0	0
		0	27.851		0	0		0	47.4732		0	131.026
		0	117.218		0	54.2675		0	0		0	177.998
		0	0		0	40.4564		0	19.8154		0	67.7026
		29.0444	35.249		0	0		0	0		0	30.0653
		0	80.4153		0	87.5108		0	0		0	85.1457
		0	38.4809		0	35.0451		0	0		0	41.9167
		0	132.264		0	0		0	0		0	0
		0	0		0	0		0	0		0	0
		0	98.1319		0	0		0	0		0	56.9516
		0	0		0	0		0	32.6516		0	133.766
		0	71.6955		0	0		0	0		0	42.1069
		0	0		0	0		0	0		0	0
		0	71.8826		0	0		0	0		0	0
		31.9907	45.021		0	0		0	0		0	0
		39.9146	0		0	34.3206		0	0		0	126.179
		0	110.113		0	21.2719		0	58.1849		0	108.236
		0	51.1199		0	0		0	30.8482		0	69.6288
		0	46.9082		51.7014	74.027		0	35.9141		0	75.4929
		0	116.682		0	0		0	14.1824		0	186.95
		0	74.6292		0	7.46292		0	47.0164		0	126.87
		0	0		0	0		36.5273	0		0	0
		0	65.3527		0	35.9807		0	0		0	116.019
		0	48.8259		0	77.6207		0	0		0	0
		0	30.0362		0	0		0	0		0	148.178
		0	60.7426		0	73.7589		0	73.0358		0	152.58
		0	91.6829		0	0		0	49.1496		0	0
		0	0		0	90.1511		0	0		0	0
		0	0		0	0		0	45.9599		0	80.2583
		0	112.943		0	0		0	0		0	0
		0	0		0	0		0	33.0231		0	135.028
		0	44.6543		0	0		0	0		0	92.9688
		0	54.0508		0	0		0	0		0	103.002
		36.8036	0		0	0		0	28.5334		0	17.4371
		0	34.2956		0	0		0	82.4727		0	55.5262
		0	0		0	60.8389		0	0		0	33.0268
		0	31.5165		0	0		0	0		0	67.4306
		0	0		0	0		0	41.1676		0	95.5089
		0	82.657		0	0		0	0		0	36.3073
		0	62.5994		0	45.1748		0	0		0	43.2387
		0	116.48		0	9.31841		0	0		0	0
		0	0		0	0		0	0		0	0
		0	101.713		0	28.8548		0	0		0	44.0036
		0	28.1509		0	24.3122		0	0		0	136.276
		26.9525	53.8782		0	0		0	42.2138		0	104.424
		0	0		39.1181	0		0	0		0	18.6752
		0	0		0	0		0	0		0	0
		0	0		0	0		0	0		0	0
		0	64.3106		0	0		0	44.5227		0	0
		0	138.112		0	14.976		0	43.264		0	0
		0	38.3545		0	0		0	0		0	73.1411
		25.5113	51.4668		0	32.2758		0	0		0	0
		0	56.5387		0	22.7725		0	0		0	0
		0	115.342		0	0		0	20.3545		0	76.1407
		0	46.3879		0	0		0	0		0	70.0551
		0	119.115		0	0		0	0		0	33.5966
		0	0		0	0		0	0		0	0
		0	130.177		0	0		0	0		0	76.0896
		0	26.0208		0	33.218		0	0		0	89.135
		0	43.414		0	0		0	0		0	73.0803
		0	74.3708		0	0		0	0		0	63.3529
		0	0		0	0		0	0		0	24.7889
		0	254.105		0	55.1129		0	0		0	166.802
		28.868	32.8885		0	63.0363		0	0		14.434	0
		0	62.7033		0	0		0	22.8606		0	114.956
		0	0		0	26.4022		0	0		0	0
		0	105.182		0	42.9874		0	0		44.6333	64.9383
		0	99.0081		0	26.624		0	0		0	55.7441
		0	78.8364		0	0		0	91.0504		0	0
		0	0		0	32.3138		0	0		0	0
		0	63.2047		0	0		0	0		0	106.846
		0	0		0	0		0	58.7198		0	57.7411
		0	26.2799		0	0		0	0		0	28.1134
		0	89.2635		0	0		0	0		0	0
		0	36.0967		0	0		0	0		0	43.316
		0	36.6038		35.6689	0		0	48.0424		0	54.9057
		0	0		0	0		0	0		0	0
		0	0		0	0		0	82.2245		0	52.6606
		0	0		0	0		0	0		17.4965	0
		0	0		0	0		0	0		0	59.2403
		0	150.561		0	0		0	0		0	0
		0	31.1549		0	0		0	0		0	106.095
		0	85.5905		5.74515	34.7446		0	35.5921		0	23.728
		0	0		0	0		0	0		0	194.922
		0	20.8793		0	61.2907		0	26.941		0	56.5761
		0	111.384		0	0		0	0		0	57.5485
		0	112.12		0	81.028		0	0		0	0
		0	28.9237		0	0		0	0		0	43.0148
		0	76.3262		0	0		0	0		0	95.0478
		0	0		0	0		0	0		0	124.609
		0	74.147		0	0		0	0		0	0
		0	106.577		0	0		0	0		0	98.2358
		0	59.3585		0	0		0	0		46.1397	67.7058
		62.9052	0		0	0		0	0		0	0
		0	61.0901		0	35.8114		0	0		0	26.683
		0	24.2629		0	0		0	10.9574		0	52.4391
		0	0		0	40.4167		0	0		0	57.956
		0	89.0023		0	0		0	0		0	104.956
		0	84.3754		0	0		0	22.044		0	0
		0	53.6993		0	16.4759		0	59.1913		0	141.571
		0	59.0359		0	31.9778		0	0		0	99.2131
		0	0		0	0		0	0		0	122.725
		0	0		0	0		0	0		0	89.9506
		0	34.4007		0	39.4971		0	0		0	21.6597
		0	0		0	0		0	16.6485		0	0
		0	65.5368		0	0		0	0		0	0
		0	0		0	48.113		0	0		0	83.4614
		0	41.3471		0	0		0	0		0	0
		0	55.9025		0	28.9616		0	37.0438		0	132.011
		0	26.3473		0	62.5748		0	0		0	41.1676
		0	10.0633		0	0		0	31.4478		0	72.3299
		0	37.9025		0	37.9025		0	0		24.6323	108.605
		30.9499	0		0	0		0	32.0259		0	52.1205
		0	120.675		0	0		0	0		0	106.413
		0	0		0	35.7078		0	0		0	0
		0	0		0	47.0534		0	0		0	177.355
		0	33.0762		0	0		0	48.2913		23.9393	101.213
		0	0		0	0		0	0		51.9301	59.3189
		0	0		0	0		0	0		0	0
		0	0		0	0		0	72.0328		0	154.737
		0	79.1485		0	0		0	0		0	140.902
		0	151.943		0	24.766		0	36.8143		0	131.862
		0	0		0	0		0	42.0743		0	58.1026
		0	97.4294		0	0		0	102.842		0	93.8209
		0	74.6853		0	53.224		0	0		0	0
		0	78.6036		0	0		0	0		19.0341	155.12
		44.6367	0		0	0		0	32.6684		0	48.1429
		0	12.1717		0	11.4955		0	0		0	0
		0	51.8027		0	0		0	46.4206		0	59.8758
		0	65.0418		0	92.5039		0	0		0	84.5544
		0	78.0267		0	32.9804		0	0		0	37.0023
		0	49.2801		0	0		0	0		0	137.088
		0	74.4165		0	0		0	69.2843		0	0
		0	39.5326		0	0		0	0		0	221.665
		0	0		0	0		0	78.6701		0	0
		0	46.2038		0	0		0	66.8305		0	29.7024
		0	0		0	42.9433		0	28.6288		0	51.7522
		0	0		0	0		0	0		0	0
		0	0		0	0		0	0		0	30.6786
		0	0		0	0		0	0		26.7682	74.6918
		0	0		0	0		0	0		0	36.1857
		0	20.0139		0	0		0	0		0	151.014
		0	0		0	0		0	0		0	0
		49.1029	134.583		0	25.3248		0	0		0	40.5198
		0	0		0	0		0	0		0	11.4083
		0	47.7716		0	0		0	0		0	89.3506
		0	0		0	0		0	0		0	65.9552
		0	0		0	104.36		0	37.4625		0	66.2284
		0	72.5007		0	24.8201		0	22.2074		0	68.5818
		0	39.2187		0	0		0	0		0	0
		0	0		0	52.0935		0	0		0	83.1668
		0	61.9149		0	0		0	0		0	106.259
		0	103.086		0	0		0	0		0	140.275
		0	0		0	0		0	0		0	0
		0	74.0378		0	0		0	27.9388		0	174.617
		0	0		0	0		0	17.0774		0	128.69
		0	0		0	0		0	0		0	107.52
		0	53.7716		0	0		0	53.1315		0	126.107
		0	114.021		0	0		0	0		0	0
		0	34.4028		0	0		0	0		0	172.814
		0	117.078		0	0		0	0		0	125.323
		0	14.6951		0	0		0	33.7987		0	54.3718
		0	73.4026		0	0		33.9981	0		0	0
		0	0		0	30.0241		0	12.8675		0	57.4747
		0	0		0	33.1871		0	0		0	122.792
		0	0		0	68.6761		0	0		0	0
		0	0		0	0		0	0		0	126.814
		0	32.3363		0	0		0	60.5001		0	0
		0	0		0	62.1153		0	0		0	68.8916
		0	0		0	60.6907		0	0		0	0
		0	56.4817		0	46.5726		0	0		0	29.7272
		0	100.216		0	0		0	65.2005		59.5193	0
		0	62.4823		0	0		0	34.5052		22.1926	42.8983
		0	54.6405		0	11.9943		0	33.3174		0	111.946
		0	33.1021		0	39.3647		0	0		21.5172	61.731
		61.3003	36.2963		0	0		0	0		0	0
		0	98.4915		0	94.359		0	73.0077		0	87.4715
		36.6897	0		52.8763	34.2801		0	0		0	91.9709
		0	50.1499		0	51.9736		0	20.9718		0	0
		0	99.0081		0	0		0	0		0	0
		0	70.2571		0	0		0	0		0	70.2571
		0	0		0	0		0	32.9341		0	101.272
		0	64.667		0	0		0	67.2029		0	57.0591
		0	185.062		0	23.1327		0	0		0	0
		0	89.0543		0	29.6848		0	29.6848		0	87.6407
		0	0		39.0525	0		0	0		0	0
		0	0		0	0		0	0		0	0
		0	0		0	0		0	0		0	0
		0	0		0	19.982		0	0		0	56.6157
		0	0		0	0		0	0		0	98.9351
		47.0867	48.6676		0	0		0	0		0	0
		0	63.9745		0	0		0	0		0	155.367
		0	0		0	0		0	0		0	82.5068
		0	0		0	0		0	0		0	34.5134
		0	0		0	0		0	0		0	0
		0	45.6682		0	0		0	69.5896		0	68.1398
		0	28.5143		0	0		0	0		0	126.73
		0	44.0852		0	0		0	0		0	66.1279
		0	53.476		0	0		0	117.802		0	16.2753
		0	24.5443		0	0		0	0		0	138.829
		0	112.198		0	22.7067		0	23.3746		0	114.202
		0	128.678		0	68.6929		0	65.7904		0	77.4005
		0	25.5505		0	87.9237		0	21.0416		0	84.1663
		0	23.4312		0	0		0	0		0	57.1996
		0	87.0933		0	0		0	0		0	75.4808
		0	96.4759		0	0		0	0		0	52.4161
		43.4008	0		0	0		0	43.008		0	0
		0	50.0179		0	31.5182		0	0		0	113.054
		0	0		0	0		0	35.5651		0	63.3504
		0	0		0	27.8013		0	26.9836		0	67.0502
		0	90.0436		0	47.8108		0	0		0	98.012
		0	64.6158		0	0		0	15.2855		0	177.172
		46.0737	0		0	0		0	0		0	33.7427
		0	0		0	73.5989		0	28.6749		0	0
		0	49.5851		0	0		0	0		0	0
		0	0		0	0		0	0		0	0
		0	173.123		0	0		0	0		0	72.6437
		0	62.3356		0	0		0	0		0	141.418
		0	0		0	0		0	0		0	97.1746
		0	0		0	0		0	0		0	37.5877
		0	0		0	9.96308		0	0		0	112.915
		0	72.0514		0	0		0	105.825		0	252.93
		0	50.8821		0	0		0	0		0	149.254
		0	158.905		0	27.4898		0	0		0	0
		30.576	23.808		0	0		0	0		0	37.632
		0	0		0	0		46.1805	0		72.2094	162.523
		0	34.3621		0	0		0	69.7656		0	0
		0	180.938		0	0		0	31.3872		38.7543	115.394
		0	79.5816		0	0		0	0		0	98.8741
		0	0		0	39.6347		0	0		0	70.7762
		0	171.706		0	0		0	36.0029		0	41.5419
		0	61.0901		0	0		0	0		0	0
		32.9823	0		0	0		0	56.8715		0	34.1229
		0	0		0	0		0	0		0	0
		0	99.4224		0	0		0	64.6245		0	0
		0	47.2741		0	0		0	43.7063		0	74.9251
		0	118.623		0	0		0	75.6571		0	72.855
		0	0		0	0		0	41.8281		0	153.963
		0	30.2544		0	0		0	0		0	0
		0	0		0	30.0603		0	43.659		0	83.0237
		0	0		0	0		0	84.3952		0	0
		0	71.9595		0	0		0	39.8074		0	81.9113
		0	0		0	56.4149		0	0		0	111.701
		0	0		0	66.0054		6.06791	0		0	124.336
		0	26.838		0	77.4173		0	0		0	0
		0	56.7749		0	0		0	55.105		22.9743	0
		0	45.5613		0	0		0	0		0	42.9327
		0	13.8151		0	60.0656		0	0		0	66.6728
		0	128.953		0	66.0491		0	0		0	50.3231
		0	47.736		0	0		0	0		0	117.749
		0	74.3834		0	0		0	0		0	39.7391
		0	35.1689		0	0		0	0		0	175.08
		0	0		0	0		0	0		0	126.964
		0	70.948		0	58.5602		0	0		0	67.5695
		0	0		0	0		0	0		34.0224	0
		0	57.8753		0	0		0	26.4573		0	0
		0	49.6257		0	0		0	0		0	0
		0	0		0	0		0	0		0	57.3564
		0	0		0	0		0	0		0	230.688
		0	65.6266		0	64.7743		0	0		0	68.1835
		53.1543	43.1195		0	0		0	0		0	73.1492
		0	0		0	64.0229		0	0		0	0
		49.8984	0		0	0		0	22.4362		0	88.7249
		0	48.8527		0	0		0	37.128		0	0
		0	56.649		0	0		0	51.2903		0	0
		0	38.08		0	0		0	0		0	102.816
		0	45.5908		0	31.9136		0	60.1799		58.575	286.31
		0	70.7739		0	0		0	43.669		11.4156	121.972
		0	103.835		0	67.1042		0	45.207		0	125.026
		0	0		0	40.4845		0	0		0	66.0972
		0	0		0	0		0	0		0	100.278
		0	0		0	0		0	0		0	39.2655
		0	51.3375		0	0		0	0		0	0
		0	59.1206		0	0		0	90.9548		0	0
		33.2198	50.1795		0	0		0	0		0	135.099
		0	0		0	0		0	39.168		0	45.696
		0	45.3158		0	0		0	0		0	0
		0	62.044		0	39.8193		0	0		0	0
		0	0		0	0		0	0		0	15.9476
		0	0		0	0		0	0		0	45.7743
		0	0		0	26.6534		0	0		0	0
		0	0		0	57.4101		0	0		31.7368	65.1945
		0	48.025		0	0		0	0		0	108.578
		0	150.824		0	0		65.3792	0		0	27.0345
		0	0		0	0		0	0		31.2159	0
		0	80.5329		0	0		0	0		0	172.435
		0	0		0	59.4499		0	0		0	0
		0	0		0	0		0	0		0	76.0062
		0	106.875		0	0		0	0		0	160.313
		0	49.1185		0	32.0338		0	0		0	77.5929
		0	0		0	68.5009		0	0		0	58.3942
		0	125.268		0	40.4591		0	68.4693		0	0
		0	119.59		0	51.1289		0	0		0	94.4585
		0	80.5199		57.4307	50.5391		0	31.694		0	231.281
		0	156.072		0	0		0	0		0	78.0359
		0	33.0361		0	57.0623		0	0		0	130.943
		0	33.4675		0	0		0	0		0	48.0186
		0	0		0	0		0	0		0	113.765
		0	53.4644		0	0		0	0		0	98.4423
		0	0		0	0		0	0		18.9792	54.1492
		0	56.1483		0	0		0	26.9512		0	62.8861
		0	54.1835		0	0		0	57.139		0	89.6491
		0	38.1993		0	37.2199		0	0		0	138.105
		0	41.0948		0	50.227		0	0		0	190.863
		0	60.7144		0	0		0	0		0	36.9048
		0	48.078		0	0		0	0		0	138.53
		0	0		0	81.9754		0	0		0	102.743
		0	62.1869		0	34.3664		0	0		0	45.8219
		0	42.432		0	47.1467		0	44.7894		0	79.3636
		0	121.358		0	0		0	0		0	0
		0	0		0	73.942		0	20.1007		0	89.0176
		0	45.4339		0	0		0	0		0	109.799
		0	39.4836		0	0		0	35.1763		25.1328	165.831
		0	91.0521		0	12.376		0	126.412		0	106.964
		0	82.4332		0	24.2006		0	0		0	65.7953
		0	39.3193		0	0		0	61.6002		0	0
		0	45.8371		0	0		0	0		0	161.347
		0	39.3091		0	43.3202		0	0		38.691	112.312
		0	0		0	0		0	27.262		0	138.069
		0	40.4003		0	0		0	42.0492		0	129.446
		0	0		34.225	0		0	0		0	40.4357
		0	181.651		0	0		0	0		0	0
		0	0		0	31.5367		0	0		0	106.839
		0	55.1472		0	38.1164		0	129.758		0	0
		45.6647	0		0	0		0	0		0	0
		0	0		0	53.1724		0	54.9157		0	83.6811
		0	49.2856		0	45.0911		0	0		0	68.1609
		0	101.813		0	37.0229		0	0		0	0
		0	35.8169		0	0		0	0		0	0
		0	0		0	0		0	51.7099		0	46.7852
		0	36.5568		0	51.1796		0	0		0	0
		0	0		0	54.8353		0	0		0	0
		0	0		0	0		0	0		0	41.5941
		0	42.8695		0	46.544		0	7.34905		0	45.3192
		0	0		0	34.4278		0	58.0548		0	92.4826
		0	5.29927		0	27.5562		0	55.1124		0	0
		0	89.3473		0	56.1189		0	0		0	95.9929
		0	165.781		0	0		0	0		0	72.195
		0	47.4054		0	0		0	0		0	109.625
		0	45.8266		0	64.4967		0	36.4916		0	0
		46.9372	39.4888		0	38.6303		0	0		0	150.229
		0	203.604		0	41.702		0	32.7074		12.6808	106.299
		0	61.205		0	27.3622		0	156.253		0	0
		0	48.6873		0	25.2921		0	58.8042		43.8412	63.2303
		0	29.1916		0	15.3256		0	39.4086		0	58.3832
		0	45.736		0	0		0	0		0	37.4204
		0	0		0	28.1707		0	0		0	69.0181
		0	58.1586		0	134.121		0	0		0	0
		0	0		0	0		0	0		0	133.494
		0	0		0	0		0	0		0	52.5796
		0	69.8099		0	0		0	52.5236		21.6181	0
		0	95.1586		0	52.6606		32.5506	36.9548		0	94.2348
		0	152.483		0	0		0	0		0	0
		0	0		0	0		0	31.4605		0	100.859
		0	174.689		0	0		0	0		0	39.9891
		0	0		0	51.4081		0	40.936		19.7096	127.568
		0	0		0	40.0482		0	0		0	0
		0	93.6707		0	0		0	17.6133		0	108.082
		0	104.851		0	85.1917		0	0		0	157.932
		0	121.8		0	40.1138		0	0		0	0
		0	46.1717		0	0		0	0		0	0
		0	89.9959		0	33.2758		0	0		0	52.1825
		0	67.3384		0	0		0	0		0	0
		0	50.6771		0	0		0	40.354		0	48.8002
		0	50.1371		0	0		0	0		0	142.815
		0	67.7774		0	0		0	106.849		0	28.7057
		0	0		0	0		0	14.6938		0	0
		0	0		0	0		0	128.623		0	50.4965
		0	0		0	42.498		0	16.6297		0	0
		0	0		0	0		0	0		0	0
		0	40.3556		0	0		0	34.8837		0	0
		0	22.3389		0	0		0	0		0	51.2967
		0	0		0	13.7399		0	0		0	0
		0	0		0	54.9911		0	0		31.0888	0
		35.0127	0		0	0		0	0		0	0
		0	44.6193		0	46.369		0	0		0	111.986
		0	30.4435		0	0		0	0		0	0
		0	0		0	0		0	0		0	105.301
		0	0		0	117.522		0	0		0	62.7856
		4.41344	0		0	0		0	32.0167		0	176.092
		0	112.819		0	48.9216		0	0		0	0
		0	95.4721		0	0		0	0		0	0
		0	31.552		0	63.1041		0	0		0	0
		0	72.2416		0	0		0	0		0	202.277
		0	83.6556		0	48.8774		0	0		0	103.395
		0	94.0278		0	0		0	0		0	107.574
		0	101.967		0	0		0	0		0	0
		0	63.384		0	0		0	33.1005		0	211.28
		0	27.559		0	104.112		0	0		0	32.9176
		0	50.6377		0	0		0	43.8356		0	86.9155
		0	46.3726		61.9877	44.7735		0	53.5683		0	208.677
		38.7634	0		0	21.4763		0	39.8845		0	89.7401
		0	26.8613		0	0		0	0		36.8171	58.8883
		0	38.4771		0	0		0	0		0	48.8002
		0	0		0	38.7309		0	0		0	59.6666
		0	61.5594		0	66.836		0	0		0	80.0273
		0	83.7604		0	0		0	91.8925		0	0
		0	65.8847		0	31.1323		0	0		0	108.601
		0	71.452		0	0		0	0		0	54.0044
		0	73.7011		0	110.996		0	0		0	0
		0	25.3837		0	0		0	0		0	110.701
		0	0		0	27.994		0	0		0	0
		0	99.2065		0	0		0	0		0	155.556
		0	21.9848		0	0		0	0		0	245.497
		0	49.7716		0	0		0	0		0	81.0796
		0	86.4346		0	0		0	0		0	78.8527
		0	0		0	37.128		0	0		0	45.1557
		0	0		0	37.9268		0	0		0	0
		0	27.1824		0	0		0	0		0	0
		0	0		0	0		0	0		0	73.3106
		0	32.7794		0	21.0283		0	0		0	73.5989
		0	125.614		0	0		0	0		0	86.3595
		0	39.7167		0	0		0	0		36.8553	51.0643
		0	0		0	27.3966		0	0		0	0
		0	79.2065		0	0		0	40.4459		0	0
		0	0		0	0		0	33.1254		0	136.918
		0	97.6192		0	84.1271		0	0		0	141.27
		0	50.931		0	84.2996		0	0		0	0
		0	93.9272		0	37.9005		0	0		0	42.0201
		0	0		0	26.5895		0	0		0	73.9318
		0	40.1637		0	0		0	0		0	99.9421
		0	63.9124		0	0		0	0		0	39.0202
		0	68.604		0	0		0	0		0	0
		0	41.9979		0	0		0	0		0	0
		0	35.566		0	0		0	32.6823		0	139.38
		0	79.2717		0	0		0	105.696		0	122.333
		0	109.536		0	18.144		0	0		0	22.176
		0	149.098		0	0		0	34.6958		0	222.241
		0	123.359		0	0		0	0		0	49.8686
		0	70.5712		0	0		0	0		0	103.624
		0	69.6604		0	17.4151		0	0		0	159.961
		0	0		0	0		0	0		0	99.2728
		0	0		0	0		0	0		0	111.364
		0	47.5239		0	0		0	0		0	0
		0	37.0715		0	71.4305		0	83.1849		0	0
		0	13.5555		0	0		0	0		0	66.98
		0	86.9718		0	48.9217		0	0		0	27.1787
		0	43.669		0	0		0	23.3403		0	108.42
		0	28.7974		0	0		0	0		0	0
		0	149.49		0	0		0	0		0	0
		0	45.4412		0	0		0	61.5349		0	106.976
		0	0		0	132.161		0	0		0	62.0346
		0	63.7229		0	0		0	40.2461		0	0
		0	0		0	23.8766		0	0		0	15.281
		0	79.3736		0	50.1307		0	50.9662		0	116.136
		0	0		0	0		0	36.247		0	79.2065
		0	52.8947		0	0		0	0		0	0
		0	78.6623		0	0		0	26.7155		0	122.446
		0	49.8963		0	0		0	0		0	29.1846
		0	30.0193		0	0		0	32.6877		0	36.0232
		0	0		0	0		0	0		0	84.5798
		0	29.1452		0	43.7179		0	0		0	0
		0	0		0	0		0	0		0	30.3086
		0	44.9459		0	10.1764		0	0		0	0
		0	49.4484		0	0		0	16.0373		0	126.962
		0	0		0	22.8784		0	45.7567		0	209.061
		0	0		0	0		0	0		39.9883	127.328
		0	88.4753		0	50.5573		0	0		0	141.741
		0	0		0	0		0	34.0917		0	253.131
		0	0		0	34.5475		0	0		0	114.597
		0	26.7165		0	0		0	0		0	116.295
		0	64.9998		0	0		0	26.329		0	112.721
		0	0		0	79.9985		0	0		0	102.176
		0	90.2699		0	0		0	39.2081		0	31.9136
		0	0		0	62.9114		0	0		34.7813	46.41
		0	83.4235		24.8672	0		0	60.505		0	133.844
		0	36.3332		0	44.5082		0	0		0	99.0081
		0	0		0	37.3424		0	0		0	43.4391
		0	78.4786		0	0		0	30.709		0	124.201
		0	85.1384		0	0		0	33.9273		0	62.0934
		0	30.7127		0	0		0	57.3843		0	0
		0	187.317		0	0		0	0		0	83.545
		0	0		0	46.6318		0	26.3571		0	116.58
		0	41.4977		0	45.1062		66.714	30.6722		0	0
		0	0		0	77.0063		0	0		0	49.5041
		51.6564	21.3112		0	48.8381		0	0		0	157.17
		0	73.0833		0	0		0	52.3434		0	78.0213
		0	29.2547		0	28.0606		0	0		15.3303	106.272
		0	44.2241		0	60.3829		0	21.2616		0	65.4857
		30.5258	43.487		0	0		0	0		41.7722	42.6665
		58.3747	0		0	0		0	0		0	0
		0	0		0	0		0	0		0	137.841
		0	62.5314		0	0		0	0		35.927	125.063
		0	117.867		0	0		0	47.1467		0	86.8847
		0	90.1821		0	0		0	91.2308		0	84.939
		0	0		0	47.6241		0	0		0	62.6634
		0	0		0	46.8661		0	18.9109		58.7785	0
		0	0		0	18.9366		0	0		0	72.2397
		0	0		0	0		0	0		0	131.539
		0	44.9977		0	0		0	37.8928		0	67.8913
		0	72.7719		0	0		0	22.9806		24.4774	3.8301
		0	0		0	0		0	0		0	141.44
		0	75.7912		0	51.2292		0	0		0	63.8611
		0	0		0	0		0	0		0	41.6065
		0	88.2723		0	39.9611		0	0		0	136.583
		0	78.4592		0	0		0	0		0	60.7125
		55.6225	49.0796		0	0		0	0		0	131.496
		0	20.7795		0	15.279		0	0		0	0
		0	52.8947		0	33.7131		0	70.9138		0	145.896
		0	0		0	0		0	33.2505		0	77.0438
		0	0		0	0		0	0		0	121.08
		0	31.3268		0	19.1441		0	56.8523		0	69.0349
		0	91.1796		0	46.9713		0	0		0	27.6302
		57.6641	38.9246		0	50.3025		0	14.3721		0	41.3199
		0	30.3602		0	43.5163		0	0		4.06883	281.338
		0	34.5628		0	0		0	0		0	130.331
		0	55.3695		0	44.1079		0	0		0	83.5234
		0	0		0	112.123		0	0		0	42.1749
		0	65.8854		0	0		0	31.3226		0	35.6429
		0	4.4233		0	0		0	0		0	60.1568
		0	0		0	41.1819		0	0		0	63.8319
		0	65.9127		0	50.0603		0	0		0	95.9489
		0	71.8193		0	0		0	0		0	116.963
		0	47.2184		0	32.6362		0	50.6903		0	0
		0	62.3289		0	0		0	70.7934		0	0
		0	39.0167		0	0		0	0		0	0
		0	33.6186		0	55.0774		0	0		0	87.2654
		0	131.602		0	0		0	0		0	193.261
		0	0		0	0		0	32.9504		0	0
		0	14.252		0	0		0	0		0	0
		0	0		0	0		0	0		0	149.883
		0	51.4413		0	0		0	0		34.0799	104.861
		0	103.524		0	25.7074		0	0		0	92.4076
		0	3.36191		0	22.861		0	0		0	203.731
		0	49.5994		0	0		0	48.8364		0	229.684
		0	77.2416		0	49.8005		0	26.4247		0	49.8005
		0	0		0	0		0	45.4576		0	79.5509
		0	69.9314		0	57.4173		0	0		0	0
		0	100.9		0	0		0	73.1525		0	76.5158
		0	94.935		0	0		0	0		0	118.434
		0	84.033		0	0		0	0		0	0
		0	22.2842		0	0		0	0		0	0
		0	51.2848		0	49.3853		0	0		0	145.307
		0	136.071		0	0		0	0		0	115.855
		0	160.509		0	0		0	23.9936		0	53.7788
		0	0		0	28.4936		0	177.006		0	48.3528
		0	94.0801		0	0		0	0		0	0
		0	72.5616		0	0		0	29.5031		0	125.986
		0	0		0	0		0	0		0	0
		0	0		0	0		0	0		0	123.632
		0	200.427		0	0		0	0		0	0
		0	0		47.2631	0		0	0		0	0
		0	0		0	0		0	0		0	143.671
		0	137.654		0	0		0	0		0	161.041
		0	118.01		0	0		0	0		0	33.0027
		0	41.9208		0	38.8534		0	28.6288		0	119.628
		0	97.4934		0	0		0	0		85.7979	97.4934
		0	38.3743		0	28.5926		0	0		46.2213	167.041
		0	0		0	27.9114		0	0		57.0555	26.0507
		0	0		0	48.0509		0	13.9503		0	0
		0	0		0	0		0	0		0	0
		0	36.8922		0	0		0	0		0	148.407
		68.5205	16.3411		0	0		0	0		0	144.187
		0	0		58.4858	0		0	0		0	212.16
		0	84.7325		0	0		0	0		0	91.1796
		0	67.2905		0	0		0	0		0	167.175
		0	90.1248		0	0		0	0		0	139.548
		0	33.0734		0	22.0489		0	59.3625		0	0
		0	105.861		0	0		0	0		0	51.04
		0	49.9847		0	0		0	51.5227		0	0
		0	49.4484		0	0		0	0		38.1412	117.607
		0	91.4471		0	0		0	0		0	109.308
		0	88.5361		0	29.512		0	0		0	0
		0	40.0678		0	40.9388		0	0		0	0
		0	0		0	0		0	40.1845		0	67.4797
		0	0		0	0		0	0		33.4675	79.0289
		0	64.4704		0	29.9327		0	0		0	0
		0	122.035		0	80.1944		0	0		0	0
		0	78.0164		0	37.0247		0	33.719		0	103.14
		0	142.299		0	0		0	26.3155		0	0
		0	42.6809		0	35.7126		0	0		0	0
		0	52.3255		0	25.3933		0	40.7831		0	80.7968
		0	92.0357		0	28.4474		0	0		0	106.259
		0	49.6361		0	0		0	0		0	101.384
		0	108.585		0	0		0	0		0	115.824
		0	0		0	37.6841		0	0		102.634	0
		0	31.9436		0	0		0	38.1263		46.9688	90.6787
		0	0		0	0		0	0		0	0
		0	0		0	0		0	0		0	0
		0	37.9094		0	0		0	32.2633		0	159.704
		0	57.837		0	41.8099		0	18.8144		0	94.0722
		0	59.2327		0	72.319		0	0		0	141.883
		0	91.3299		0	0		0	71.1242		0	126.892
		0	63.3858		0	39.4229		0	0		0	26.2819
		0	0		0	0		0	0		0	23.6484
		0	0		0	0		0	0		0	0
		0	42.2847		0	22.6894		0	30.94		0	111.384
		0	83.1238		0	0		0	0		0	0
		0	0		0	0		0	0		0	59.691
		0	75.9278		0	0		0	0		0	139.776
		0	0		0	0		0	0		0	0
		0	91.7812		0	64.3191		0	0		0	0
		0	0		0	0		0	0		0	0
		0	38.8382		0	33.5421		0	0		0	66.2016
		0	98.1574		0	0		0	0		0	97.3721
		104.264	36.9484		0	47.6224		0	60.7596		106.839	157.647
		0	68.6135		0	18.7784		0	20.2229		0	0
		0	144.508		0	31.2853		0	0		0	85.6622
		0	51.0226		0	0		0	0		0	0
		29.0008	102.434		0	0		0	0		0	0
		0	60.1093		0	0		0	0		0	81.711
		0	0		0	0		0	0		0	79.8181
		0	0		0	79.4183		0	0		0	176.838
		0	66.115		0	0		61.0485	9.86792		0	30.5905
		0	0		0	0		0	0		0	0
		0	87.2691		0	65.9672		0	37.1066		0	0
		45.1176	130.992		0	46.5022		0	0		0	262.639
		0	51.9387		0	0		0	0		0	0
		0	194.77		0	42.8494		0	0		0	98.3589
		0	41.7756		0	0		0	106.11		0	93.5773
		0	41.6241		0	28.9559		0	0		0	33.4803
		0	0		0	0		0	0		0	0
		41.3578	0		0	49.8636		0	48.9047		0	42.1923
		0	48.3753		0	0		0	0		0	86.108
		0	37.7992		0	0		0	40.3764		0	82.471
		0	77.1492		0	0		0	0		0	33.5826
		0	0		0	0		0	0		0	216.49
		0	0		0	0		0	0		0	0
		0	38.7273		0	31.8117		0	20.7467		0	69.1558
		0	0		0	0		0	0		0	129.967
		0	113.348		0	0		0	0		4.76382	0
		0	69.7937		0	0		0	0		0	152.423
		0	44.0036		0	22.0018		0	0		0	180.904
		0	0		0	0		0	0		0	0
		0	74.8214		0	0		0	0		0	177.598
		0	75.8194		0	0		0	31.2657		0	167.272
		0	28.3977		0	0		0	0		0	106.683
		0	94.0221		0	66.4803		0	0		40.5494	35.1396
		0	93.551		0	0		0	0		0	0
		0	0		0	35.4127		0	0		0	0
		0	0		0	0		0	0		0	0
		12.4962	0		0	0		0	32.8506		0	0
		0	0		0	0		0	0		0	90.753
		0	110.755		0	0		0	0		0	79.4302
		0	44.4468		0	94.8768		0	0		0	0
		0	66.115		0	0		0	0		0	0
		0	0		0	56.2165		0	0		0	96.4909
		0	0		0	0		0	0		0	81.1688
		0	0		0	0		0	0		0	0
		0	0		0	43.6706		0	0		0	0
		0	94.8353		0	0		0	0		0	62.9707
		0	0		0	0		0	0		0	0
		0	41.0332		0	0		43.1408	59.6846		27.6101	75.5384
		0	0		0	73.7358		0	5.94643		0	88.0072
		0	34.5789		0	0		0	0		41.5689	0
		0	39.8632		0	28.5975		0	0		0	148.187
		0	80.1292		0	49.5344		0	56.0904		0	51.7197
		0	37.7459		0	58.4163		0	0		0	108.744
		0	53.5075		0	32.2196		0	75.9462		56.4009	138.084
		89.2087	45.3729		0	0		0	0		54.0659	176.45
		0	45.2608		0	0		0	69.5077		0	112.344
		63.8463	53.8994		0	54.6694		0	43.8895		0	83.9291
		0	26.7219		0	15.0739		0	43.1662		0	90.4434
		0	71.2858		0	12.9611		0	0		0	144.012
		0	75.3739		0	84.3166		0	61.3211		0	113.7
		0	0		0	113.336		0	0		0	0
		0	79.0328		0	0		0	0		0	25.1863
		0	37.6576		0	74.3738		0	0		0	0
		0	0		0	0		0	0		0	57.8842
		0	40.8562		0	0		0	0		32.8302	41.6733
		0	124.904		0	73.7388		0	0		0	51.1657
		0	0		0	0		0	0		40.5169	43.7063
		0	0		0	0		0	0		0	67.5278
		0	0		0	0		0	0		0	0
		0	45.3049		0	0		0	0		0	140.538
		0	35.9792		0	0		0	0		0	40.6722
		0	24.8599		0	58.0065		0	0		0	146.052
		0	33.0027		0	0		0	0		0	0
		0	0		0	0		0	59.3092		0	67.9186
		0	34.4492		0	0		0	26.4378		0	0
		39.761	26.745		0	0		0	0		0	90.5217
		0	30.236		0	0		0	0		0	0
		0	0		0	21.3289		0	0		0	0
		0	63.3464		0	23.227		0	0		0	57.7156
		0	42.6306		0	0		0	47.2644		0	0
		0	0		0	30.0151		0	44.1889		0	54.1939
		0	0		0	96.2161		0	0		0	0
		0	0		0	63.3191		0	0		0	0
		0	145.969		0	0		0	34.5017		0	110.582
		0	0		0	0		0	0		0	147.339
		0	0		0	42.7641		0	17.6634		0	0
		0	83.1497		0	0		0	0		0	55.7188
		0	119.739		0	0		0	5.16115		0	139.351
		0	49.4278		0	23.7986		0	0		0	0
		0	0		0	0		0	0		0	26.5855
		0	0		0	0		0	0		0	24.264
		0	91.0274		0	0		0	0		39.7167	59.7367
		0	40.6542		0	24.0606		0	0		0	171.743
		0	39.014		0	0		0	0		0	43.8907
		0	28.4234		0	103.461		0	0		0	97.7764
		0	0		0	0		0	0		0	0
		0	68.0301		0	0		0	0		0	46.1633
		0	92.7981		0	0		0	0		0	86.471
		0	0		0	0		0	44.7604		0	0
		0	52.5936		0	0		0	0		0	102.601
		0	0		0	28.6834		0	36.2317		0	211.351
		0	137.999		0	18.3604		0	0		0	110.163
		0	65.6881		0	0		0	72.1141		0	94.9621
		0	60.8241		0	21.8967		0	35.6835		54.3491	70.5559
		0	183.707		0	69.2364		0	0		55.0696	28.6177
		0	18.9478		0	55.4399		0	21.0531		0	0
		0	63.8484		0	0		0	0		0	87.1444
		0	38.7002		0	0		0	49.3428		0	77.4005
		0	0		26.4231	0		0	0		0	0
		0	0		0	0		0	33.2052		0	132.011
		0	11.7702		0	150.243		0	20.0786		0	44.3113
		0	48.4481		0	25.3421		0	27.5782		0	99.1323
		0	63.4698		0	39.2229		0	0		0	59.1909
		0	0		0	37.7879		0	0		0	76.6873
		0	0		0	0		0	0		0	0
		0	0		0	0		0	0		0	0
		0	74.7701		0	0		0	69.5362		0	22.431
		0	0		0	40.2472		0	0		0	26.5631
		0	42.6691		0	0		0	35.0835		0	0
		0	0		0	0		0	0		0	175.537
		0	34.7101		0	0		0	0		0	0
		0	42.4624		0	0		0	0		0	54.3518
		0	0		0	0		0	0		0	0
		0	0		0	77.5992		0	9.04069		0	0
		0	34.4482		0	0		0	0		0	15.3918
		108.975	126.437		32.7812	0		0	0		0	121.627
		0	50.903		0	0		0	0		0	109.387
		0	33.1913		5.11229	0		0	0		0	50.5413
		0	40.6338		0	0		0	38.8671		0	0
		0	0		0	51.7023		0	0		0	104.46
		0	0		0	0		0	0		0	45.2277
		0	0		0	0		0	31.5334		0	35.6022
		0	0		0	0		0	0		0	0
		0	24.4502		0	0		0	0		0	82.4061
		0	104.46		0	34.8199		0	0		0	0
		0	102.717		0	0		0	0		39.6032	147.228
		0	162.792		0	0		0	0		21.9082	69.4961
		0	96.2609		0	34.944		0	32.9661		0	123.952
		0	38.8993		0	0		0	0		48.514	80.0215
		0	0		0	0		0	21.3994		0	0
		0	60.472		0	0		0	0		0	120.055
		0	0		0	0		0	0		0	0
		0	58.0571		0	0		0	0		0	0
		0	0		0	19.4998		0	27.1605		0	151.124
		0	0		0	0		0	0		0	0
		0	107.353		0	0		0	0		0	0
		0	0		0	42.4087		0	11.0915		0	121.354
		0	143.415		0	0		0	65.3805		0	85.0649
		0	28.3977		0	28.3977		0	0		0	214.134
		0	66.6826		0	0		0	0		0	95.3633
		0	76.2532		0	100.945		0	0		0	0
		0	97.3627		0	26.5535		0	0		0	35.4046
		0	84.627		0	4.14838		0	39.8245		0	245.584
		0	10.1082		0	0		0	0		0	55.9836
		0	32.8454		0	32.8454		0	0		0	0
		0	82.0725		0	0		0	0		0	28.3346
		0	0		0	48.4708		0	0		0	64.2519
		0	0		0	0		0	0		0	121.426
		0	54.3752		0	0		0	0		0	24.4688
		0	0		0	0		0	0		0	89.9317
		0	0		0	0		0	0		0	76.1457
		0	0		0	0		0	59.7948		0	0
		0	0		0	57.0104		0	0		0	71.8331
		37.1809	0		0	0		0	0		0	31.1452
		0	41.7594		0	0		0	0		90.0927	0
		0	85.8952		0	32.4814		0	73.6245		0	17.3234
		0	28.3427		0	0		0	0		65.3207	52.0894
		0	0		0	48.8369		0	38.429		0	94.4713
		0	0		0	0		0	75.0301		0	91.0559
		0	43.0042		0	23.6102		0	18.5508		0	68.3008
		0	0		0	40.1045		0	0		0	0
		0	136.669		0	0		0	0		0	122.415
		0	19.6575		0	0		0	0		0	33.0245
		76.8471	44.5885		0	0		0	0		0	37.1571
		0	4.15128		0	0		0	0		0	19.9262
		0	48.7306		0	0		0	0		0	0
		0	62.4219		0	0		0	0		0	0
		0	0		0	0		0	0		0	33.8465
		0	0		0	0		0	0		0	71.138
		0	32.7957		0	0		0	0		0	0
		0	0		0	50.5573		0	0		0	111.046
		0	85.6375		0	67.9194		0	0		0	0
		0	68.6942		0	0		0	0		0	40.592
		0	56.5353		0	33.4072		0	0		0	0
		0	95.1942		0	0		0	31.1212		0	0
		0	0		0	51.8652		0	0		0	0
		0	51.6309		0	22.8819		0	71.5792		0	84.4869
		0	33.5463		0	0		0	0		0	11.881
		0	0		0	0		0	0		0	0
		0	0		0	0		0	0		0	52.1095
		0	61.0175		0	0		0	0		0	0
		0	26.0738		0	0		0	0		0	0
		0	88.0625		0	21.6425		0	0		0	115.675
		0	58.2401		0	0		0	0		0	140.608
		0	141.205		0	42.2714		0	0		0	56.6617
		0	93.455		34.903	0		0	13.0024		0	37.382
		0	91.3921		0	0		0	46.1153		0	207.938
		0	120.459		0	0		0	0		0	58.0784
		0	22.9215		0	0		0	0		0	234.563
		0	68.5614		0	0		0	0		0	79.3869
		0	0		0	25.9851		0	0		0	0
		0	75.0603		0	0		0	0		0	0
		0	0		0	0		0	0		0	33.0235
		50.4143	0		0	0		0	49.5544		0	96.6915
		0	0		0	43.2035		0	0		88.7143	0
		0	0		0	39.5515		0	0		0	78.3276
		0	0		0	0		0	43.3217		0	0
		0	0		0	0		0	0		0	0
		0	0		0	0		0	0		0	50.6519
		0	40.9368		0	0		0	30.7026		0	0
		0	0		0	39.9163		0	0		0	30.5242
		0	0		0	0		0	0		0	109.043
		0	26.5003		0	0		0	0		0	101.585
		0	0		0	34.1898		0	0		0	0
		0	41.6367		0	0		0	0		0	0
		0	147.049		0	0		0	0		0	82.6693
		0	27.456		0	0		0	0		0	84.8641
		0	66.3361		0	0		0	45.925		0	72.2894
		0	35.2153		0	64.5614		0	0		0	46.9537
		0	0		0	0		0	0		0	131.616
		0	49.6009		0	0		0	0		0	0
		0	35.6429		0	0		0	0		0	0
		0	0		0	0		0	0		0	0
		0	0		0	0		0	0		0	108.176
		0	0		0	0		0	0		0	53.5829
		0	75.3428		0	23.1824		0	0		0	137.935
		0	0		0	0		0	0		0	109.281
		0	46.6647		0	0		0	0		0	45.1832
		0	0		0	28.5404		0	40.772		0	153.303
		0	53.7899		0	55.6773		27.3025	54.7336		0	0
		0	0		0	38.8832		0	0		0	142.572
		0	0		0	0		0	0		0	71.4645
		0	51.522		0	0		0	15.4566		0	170.023
		0	52.5633		0	0		0	0		0	31.7048
		0	0		0	0		0	0		0	102.892
		0	68.408		0	0		0	0		0	98.2873
		0	0		0	0		0	0		0	59.7248
		0	103.077		0	51.5385		0	0		0	93.1309
		0	0		0	0		0	0		18.8388	142.348
		0	43.4188		0	93.9426		0	69.4701		0	106.574
		0	0		0	28.8578		0	40.8232		0	0
		0	81.6021		0	0		0	52.405		0	146.734
		0	0		0	0		0	18.7043		0	190.036
		0	108.249		0	0		0	14.9612		0	94.1677
		0	87.1444		0	0		0	0		0	223.469
		0	0		0	52.4003		0	14.9715		0	57.7473
		0	0		0	31.3091		0	33.7808		0	42.0201
		0	0		0	0		0	0		0	35.7529
		0	0		0	37.8605		0	39.6633		0	84.7353
		0	32.3092		0	35.9807		0	0		0	62.4155
		0	51.9899		0	0		0	0		0	0
		0	28.225		0	0		0	0		0	25.5789
		0	64.7518		0	0		0	12.7541		0	31.3948
		0	0		0	0		0	0		0	91.7363
		0	39.6032		0	0		0	0		0	0
		0	0		0	0		0	0		0	0
		0	0		0	0		0	0		59.5263	0
		0	38.8157		0	0		0	0		0	0
		0	40.2904		0	12.1808		0	0		0	110.564
		0	61.652		0	0		0	41.4855		0	84.6995
		0	113.478		0	0		0	0		0	53.3208
		0	54.4477		0	0		0	0		0	0
		0	0		0	0		0	0		0	69.5362
		0	0		0	81.1743		0	0		0	0
		0	39.1927		0	0		0	0		0	0
		0	0		0	26.0405		0	0		0	65.915
		0	0		55.1972	68.7436		0	12.9705		0	92.739
		0	39.6572		0	0		0	0		0	0
		0	71.3368		0	74.7338		0	0		0	0
		0	0		0	0		0	0		0	108.009
		0	70.489		0	0		0	0		0	114.417
		0	65.2868		0	32.0275		0	118.255		0	22.1729
		0	0		0	29.0252		27.4339	0		0	0
		0	0		0	44.6583		0	0		0	49.3102
		0	0		0	0		0	0		42.2882	0
		43.316	32.6352		0	0		0	0		0	69.6805
		0	46.8846		0	0		0	0		0	0
		0	0		0	47.8964		0	0		0	0
		0	0		0	0		0	0		0	135.921
		80.0817	25.4302		0	0		0	0		0	39.6711
		0	66.8739		0	0		0	68.6109		0	36.4767
		0	140.54		0	38.9734		0	0		0	37.7924
		0	0		0	0		0	0		0	23.6973
		0	0		0	35.3268		0	0		0	55.7792
		0	60.2871		0	0		0	41.9069		0	117.633
		0	59.2403		0	0		0	0		0	69.1137
		0	0		0	32.1604		0	0		0	33.0793
		0	47.0808		0	0		0	82.1606		0	105.239
		0	0		0	0		0	27.4841		0	112.292
		0	55.2814		0	0		0	28.0938		0	106.032
		0	39.0947		0	0		0	84.8641		0	182.124
		0	0		0	0		0	0		0	0
		0	0		0	0		0	0		0	85.4746
		0	0		0	23.036		0	0		0	159.856
		0	0		0	0		0	0		0	54.8353
		0	40.5595		0	52.4306		0	0		0	226.54
		0	0		0	48.665		0	0		0	0
		0	0		0	0		0	0		0	66.3061
		0	105.467		0	0		0	0		0	0
		0	43.6363		0	0		0	0		0	107.107
		0	47.9013		0	0		0	0		0	94.351
		0	0		0	30.2941		0	0		0	0
		0	0		0	0		0	26.0167		0	113.978
		88.6282	0		0	30.3559		0	37.1017		22.7559	45.5339
		0	75.1826		0	0		0	0		0	0
		0	26.6897		0	0		0	0		0	59.8497
		0	0		0	0		0	33.4152		0	23.205
		0	69.5662		0	0		0	0		0	88.3256
		0	0		0	0		0	0		0	0
		0	0		0	102.797		0	0		20.2709	127.508
		0	44.6725		0	0		0	0		0	169.185
		0	5.52603		0	0		0	0		0	0
		0	0		0	38.903		0	0		0	133.826
		0	0		0	0		0	0		0	0
		0	63.715		0	0		0	0		55.4373	52.4712
		0	0		0	0		0	23.2201		0	56.1153
		0	0		0	37.2945		0	0		0	119.343
		44.8567	93.2665		0	0		0	0		0	99.1481
		0	77.9501		0	31.694		0	0		0	37.6902
		0	0		0	0		0	43.4928		0	0
		0	0		0	52.9478		0	0		0	89.1073
		0	80.3104		0	33.1177		0	0		0	79.4825
		0	0		0	0		0	0		0	0
		0	0		0	0		0	0		0	0
		0	34.1081		0	0		0	0		56.6334	0
		0	75.2289		0	0		0	72.6348		0	0
		0	22.2708		0	66.8123		0	0		0	127.815
		0	51.1879		0	0		0	0		0	51.1879
		0	0		0	0		0	0		0	62.7592
		0	32.1917		0	43.4213		0	44.17		0	0
		0	138.82		0	0		0	0		0	61.2808
		0	0		0	0		0	0		25.0365	192.818
		0	60.2316		0	0		0	36.6113		0	0
		0	100.079		0	0		0	0		0	97.3248
		0	0		0	0		0	43.2691		0	114.483
		0	14.3625		0	0		0	0		0	239.375
		0	60.167		0	40.9135		0	0		0	44.1224
		0	36.8171		0	0		0	31.8418		0	0
		0	52.8043		0	0		0	0		0	157.397
		0	0		0	0		0	0		0	27.6992
		0	32.1949		0	0		0	0		0	85.1608
		0	0		0	0		0	0		0	79.053
		0	0		0	41.7262		0	0		0	90.7727
		0	0		0	35.1618		0	0		0	0
		0	0		0	0		0	0		0	43.713
		0	0		0	0		0	0		0	0
		0	115.41		0	76.0454		0	0		0	0
		33.4003	0		0	0		0	0		0	0
		0	0		75.7674	44.9186		0	0		0	0
		0	0		0	95.0478		0	55.0845		0	0
		0	39.681		0	39.681		0	60.6887		0	67.6912
		0	0		0	48.7		0	0		0	139.668
		0	0		0	0		0	0		0	19.2813
		0	0		0	0		0	0		0	104.558
		0	138.712		0	0		0	0		0	0
		0	50.2898		0	0		0	30.5331		0	58.3721
		38.4935	56.0017		0	0		0	0		0	56.8632
		0	27.0241		0	0		0	0		0	93.6194
		62.4001	0		0	0		0	0		0	0
		0	0		6.66721	38.7634		0	0		0	0
		0	0		0	0		0	0		0	0
		0	0		0	0		0	26.6868		0	71.5207
		0	0		0	0		0	0		0	25.9788
		0	0		0	0		0	35.6335		0	103.15
		0	0		0	82.3434		0	33.6095		0	36.1303
		0	47.6641		0	0		0	0		0	34.3462
		0	90.0406		0	0		0	0		0	58.197
		0	86.5206		0	48.1661		0	0		0	95.4402
		0	0		0	0		0	0		0	58.5048
		0	151.887		0	63.0052		0	0		0	0
		0	0		0	41.0592		0	27.9552		0	0
		0	0		0	0		0	67.6764		0	0
		0	58.0267		0	0		0	0		0	0
		0	27.1008		0	0		0	0		0	0
		0	0		0	52.5448		0	17.5149		0	92.44
		0	52.3532		0	77.9956		0	27.7793		0	71.585
		0	36.4849		0	41.1624		0	39.2914		0	99.164
		0	72.2094		0	0		0	31.9065		0	65.4923
		75.0942	24.5511		0	36.8266		0	34.1962		0	28.9352
		0	40.3722		0	0		0	0		0	138.419
		0	0		0	0		0	48.4435		0	110.845
		0	0		0	0		0	0		0	115.867
		0	51.1122		0	0		0	0		0	0
		0	0		0	0		0	0		0	104.246
		0	0		0	0		0	0		0	55.2917
		0	0		0	48.8259		0	0		0	0
		0	85.73		0	0		0	64.081		0	51.9576
		0	42.1714		0	0		0	0		0	131.38
		0	58.6232		0	24.4263		0	27.3575		0	64.4855
		0	31.6106		0	0		0	0		0	0
		0	44.1232		0	0		0	0		0	153.893
		0	65.3		0	0		0	35.3708		0	91.6014
		0	90.0654		0	0		0	0		0	68.9863
		0	0		0	31.5349		0	0		0	113.355
		0	0		0	0		0	0		0	0
		0	54.9957		0	54.0475		0	0		0	71.1152
		0	70.6069		0	36.6613		0	59.7443		0	131.709
		0	0		53.2128	0		0	29.7257		0	45.5174
		0	73.9374		0	33.9942		0	0		46.9248	107.932
		0	78.8812		0	0		0	41.4736		0	121.168
		0	26.7992		0	0		0	64.7647		0	99.7525
		0	34.4931		0	0		0	23.7619		0	0
		0	52.6498		0	66.5573		0	0		0	0
		0	97.6967		0	7.21251		0	24.9159		14.9985	108.843
		0	0		0	0		0	0		0	0
		0	72.0328		0	46.2433		0	0		0	0
		0	0		0	0		0	0		56.7046	127.085
		0	37.509		0	0		0	0		0	129.406
		0	75.3718		0	0		0	0		0	0
		0	41.2943		0	0		0	0		0	93.2072
		0	95.9983		0	0		0	0		0	0
		0	57.28		0	0		0	22.1729		0	82.2245
		0	0		0	0		0	0		0	166.51
		0	0		0	0		0	0		0	0
		0	29.5967		0	0		0	0		0	15.8554
		0	0		0	0		0	0		0	0
		0	41.8713		0	0		0	0		0	48.4137
		0	95.2249		0	0		0	32.1107		0	0
		0	0		0	66.4898		0	0		0	0
		0	99.9334		0	0		0	0		0	84.792
		0	34.2614		0	0		0	0		0	198.937
		0	31.4133		0	88.6305		0	0		0	94.24
		0	0		0	0		0	0		0	81.7931
		0	20.5925		0	58.1962		0	34.9177		0	143.252
		0	47.8363		0	51.7413		0	39.05		0	79.0763
		0	0		0	0		0	0		0	29.496
		0	52.0757		0	0		0	33.7528		0	0
		0	0		0	51.1856		0	0		0	0
		0	0		63.8762	125.808		0	0		0	124.142
		0	43.8592		0	0		0	0		34.3042	0
		0	0		0	0		0	0		0	76.7485
		0	88.927		0	0		0	0		0	165.837
		0	23.8149		0	0		0	0		0	49.3938
		0	19.9809		0	50.7208		0	0		0	116.043
		0	0		0	54.6001		0	0		0	0
		0	0		0	36.7564		0	46.4861		0	0
		0	87.8485		0	0		0	0		0	14.9985
		0	82.4053		0	53.1984		0	0		0	0
		0	159.102		0	0		0	0		0	0
		0	0		0	0		0	0		0	139.611
		0	57.5801		0	50.2812		0	0		0	71.3669
		0	67.4098		0	0		0	0		0	142.042
		0	170.599		0	0		0	0		0	0
		0	0		0	0		0	0		0	60.2299
		0	50.8868		0	0		0	0		0	0
		0	43.9329		0	0		0	69.7195		0	0
		48.6665	0		0	0		0	41.4354		0	0
		0	60.0152		0	143.426		0	0		0	159.701
		0	87.9379		81.6504	88.8734		0	0		0	0
		0	42.0979		0	0		0	0		0	24.3232
		0	0		0	0		0	0		41.4713	133.546
		0	0		0	0		0	0		0	75.0887
		0	0		0	0		0	28.059		0	88.987
		0	0		0	0		0	0		0	0
		0	89.8821		0	0		0	0		0	85.7496
		0	85.2528		0	0		0	0		0	39.9056
		0	52.2453		0	0		0	46.4403		39.2759	0
		0	0		0	91.1774		0	0		0	117.228
		0	0		0	0		0	0		0	0
		0	58.0721		0	70.4481		0	0		0	80.9201
		0	0		0	4.18639		0	71.1686		0	152.385
		0	0		0	16.365		0	0		0	354.574
		0	182.784		0	0		0	0		0	107.52
		0	114.19		0	0		0	0		0	131.623
		0	0		0	0		0	0		0	186.211
		0	0		0	0		0	30.6972		0	71.6269
		0	0		0	0		0	42.8346		0	75.5242
		0	41.5419		0	0		0	0		0	0
		0	0		0	46.2458		0	50.45		0	0
		0	38.9221		0	0		0	0		50.0251	0
		0	131.907		0	0		0	0		0	151.553
		0	62.3645		0	0		0	0		0	0
		0	164.543		0	0		0	67.753		0	43.5555
		0	26.1584		0	0		0	0		64.6303	148.512
		0	140.609		0	51.9026		0	0		0	104.749
		0	0		0	0		0	78.1504		0	126.73
		0	110.052		0	0		0	0		0	129.427
		0	111.348		0	0		0	0		59.1033	84.9461
		0	0		0	0		0	0		0	0
		0	70.1795		0	0		0	24.7692		0	0
		0	0		0	0		0	0		0	0
		0	0		0	0		0	0		21.5097	100.766
		0	0		0	36.5273		0	0		0	69.2096
		0	30.2629		0	0		0	0		47.852	0
		0	0		0	0		0	0		0	0
		0	0		0	0		0	0		0	5.32302
		53.0765	0		0	0		0	0		0	0
		0	126.543		0	31.6357		0	79.6752		0	115.998
		0	177.574		0	0		0	0		0	0
		0	0		0	0		0	0		0	3.73615
		0	32.2526		0	0		0	0		0	0
		0	230.334		0	0		0	0		0	0
		0	0		0	0		0	39.0705		0	134.971
		44.0036	54.2415		0	0		0	0		0	80.3191
		0	0		0	45.6105		0	0		0	78.984
		0	49.3459		0	0		0	0		0	49.3459
		0	122.725		0	0		0	0		0	0
		0	85.1745		0	0		0	0		0	121.678
		0	55.9895		0	0		0	0		0	60.4687
		0	51.3132		0	0		0	0		0	14.8019
		0	56.363		0	0		0	0		0	39.3647
		0	0		0	0		0	0		0	0
		0	0		0	35.7553		0	0		0	0
		0	57.8169		0	0		0	0		0	61.8885
		0	0		0	44.5885		0	0		0	0
		0	96.6693		0	23.9075		0	0		103.959	81.0775
		50.7044	0		0	0		0	0		0	0
		0	0		0	0		0	0		0	0
		0	0		0	53.3368		0	0		0	76.5268
		0	81.8278		0	0		0	38.2572		0	27.6302
		0	61.4859		0	0		0	0		0	0
		0	94.0746		0	34.0615		0	0		0	58.3911
		0	68.1877		0	106.729		0	0		0	0
		0	91.4749		0	0		0	0		0	101.16
		0	52.9797		0	0		0	0		0	0
		0	43.3612		0	37.2906		0	0		0	95.3947
		0	47.5239		0	0		0	0		0	28.9276
		0	0		0	0		0	0		0	110.719
		0	31.8311		0	0		0	0		0	81.9652
		0	104.112		0	0		0	0		0	26.2466
		0	51.3298		0	0		0	0		0	88.8882
		5.56225	50.8023		0	0		0	0		5.56225	29.1267
		0	58.4475		0	0		0	0		0	114.88
		0	30.5386		0	0		0	58.1688		0	91.6158
		0	101.15		0	0		0	0		0	0
		0	0		0	0		0	36.8662		0	0
		67.8913	33.9667		0	24.3674		0	0		0	101.9
		0	79.5421		12.8675	0		0	0		0	153.043
		0	55.8917		0	47.1087		0	13.5737		0	100.605
		55.2341	40.8584		0	0		0	0		0	43.2618
		0	0		0	0		0	59.1093		0	21.6734
		0	52.0859		0	43.1056		0	0		45.1176	76.3328
		53.6334	40.8033		0	44.4036		0	0		0	6.00049
		0	0		0	0		0	0		0	130.852
		0	25.9191		0	41.805		0	81.9377		0	51.8382
		0	83.7224		0	0		0	23.5945		0	25.1167
		0	0		0	0		0	0		0	0
		0	251.742		0	0		0	0		0	78.7971
		0	0		0	41.7924		0	0		0	144.141
		0	42.318		0	0		0	0		0	0
		0	117.168		0	0		0	44.0312		0	173.886
		0	0		0	0		0	0		0	158.82
		0	39.5226		0	0		0	24.1975		0	137.119
		0	35.0786		0	67.8695		0	28.2154		0	157.091
		0	106.472		0	0		0	77.7418		0	74.3617
		0	50.8626		0	18.2584		0	33.9084		25.6608	22.1709
		0	0		0	0		0	0		0	128.815
		0	70.5696		0	0		0	0		0	45.2909
		0	48.1319		0	35.4656		0	0		0	0
		0	150.392		0	0		0	0		0	91.1752
		0	46.252		0	0		0	0		0	0
		0	0		0	25.452		55.1321	39.705		0	35.6327
		0	0		0	0		0	0		0	94.7034
		0	64.488		0	0		0	0		0	17.4497
		0	54.5468		0	27.2734		0	0		0	37.5009
		0	0		0	0		0	0		0	0
		0	0		0	0		0	0		0	32.3103
		0	66.5895		0	0		0	34.1709		0	0
		0	88.2741		0	0		0	0		0	77.465
		0	57.5151		0	0		0	76.4129		0	97.7756
		0	36.3969		0	0		0	0		0	72.7937
		0	142.348		0	40.0064		0	0		0	53.0317
		0	0		0	0		0	0		0	108.196
		0	0		0	0		0	55.3188		0	0
		0	0		0	0		0	0		0	107.917
		0	44.4036		0	0		0	37.203		0	0
		0	0		59.6128	0		0	0		0	30.8985
		0	94.3994		0	43.8623		0	0		0	0
		0	64.2794		0	47.1382		0	0		0	109.275
		0	4.84542		0	0		0	0		66.2403	0
		0	30.562		0	0		0	24.8316		0	128.933
		0	78.6447		0	42.1311		0	0		0	53.3661
		0	169.046		0	48.7082		0	30.562		0	36.2924
		0	42.7822		0	0		0	0		0	0
		0	0		0	45.5949		0	67.5155		0	0
		0	0		0	0		0	0		0	19.6527
		0	0		0	0		0	0		0	163.072
		0	0		0	41.9538		0	0		0	74.0887
		0	0		0	0		0	48.9216		0	0
		0	85.0098		0	0		0	0		0	138.056
		0	0		0	39.6032		0	0		0	106.552
		0	33.8557		0	32.281		0	0		0	126.762
		0	83.2308		0	50.3044		0	60.3652		0	158.23
		0	101.115		0	26.8586		0	0		0	46.6075
		0	104.811		0	0		0	13.9259		0	78.4247
		0	0		0	0		0	100.346		0	221.765
		0	14.8861		0	0		0	79.0824		0	23.2595
		0	0		0	37.5285		0	0		0	118.077
		0	64.3524		0	81.6514		0	0		0	139.084
		0	0		0	29.6099		0	0		0	25.9087
		0	69.2277		0	46.7755		0	0		0	38.3559
		0	45.979		0	0		0	0		49.0845	27.5874
		0	0		0	0		0	0		0	0
		0	65.1418		0	34.0514		0	0		0	140.647
		0	48.3042		0	97.5373		0	75.2431		0	0
		0	27.3942		0	0		0	0		0	0
		0	80.4321		0	0		0	0		0	65.1117
		0	0		0	0		0	0		0	0
		0	0		0	0		0	0		0	63.2292
		0	198.016		0	0		0	0		0	37.128
		0	113.036		0	28.4623		0	0		0	96.7718
		0	0		0	0		0	0		0	0
		0	0		0	0		0	0		0	0
		0	41.6876		0	63.4377		0	69.7815		0	58.0002
		0	0		77.0736	28.978		0	0		0	223.544
		0	77.2548		0	0		0	0		24.638	82.134
		0	33.6435		0	0		0	78.822		0	0
		0	35.834		0	0		0	0		0	0
		0	0		0	0		0	0		0	0
		0	0		0	0		0	0		0	104.42
		0	47.4356		0	0		0	0		0	0
		0	0		0	0		0	0		31.0868	0
		0	0		0	70.5263		0	0		0	104.162
		0	29.8892		0	64.76		0	0		0	0
		0	65.2005		0	52.5226		0	0		0	47.9948
		0	34.0134		0	0		0	0		0	0
		0	37.2899		0	0		0	0		0	38.3257
		0	133.651		0	0		0	31.9778		0	88.5538
		0	164.519		0	0		0	0		0	85.6515
		0	0		0	33.855		0	0		0	0
		0	159.171		0	0		0	0		0	150.644
		0	74.3889		0	0		0	39.3199		0	141.339
		0	35.7861		0	0		0	59.9417		0	120.778
		0	61.7023		0	0		0	53.8254		12.4861	0
		0	0		0	0		0	0		0	0
		0	85.7832		0	30.0241		31.2364	0		0	0
		0	27.5269		0	0		0	0		0	79.9168
		0	0		0	0		0	0		22.0018	0
		0	52.9455		0	33.8851		0	0		0	117.539
		0	129.842		0	50.0698		0	0		0	179.063
		0	33.3		0	0		0	0		49.3172	123.686
		0	0		0	0		0	0		0	0
		0	32.0566		0	0		0	0		0	80.1415
		0	0		0	0		0	46.094		0	0
		0	0		0	0		0	0		0	61.8801
		38.5589	0		0	0		0	0		34.944	259.106
		0	0		0	0		0	0		0	0
		0	45.9208		0	0		0	0		0	73.4733
		0	105.236		0	28.2154		0	0		0	91.5094
		0	149.446		0	0		0	0		0	0
		0	80.8289		0	30.4195		0	0		0	0
		0	51.4211		0	0		0	33.3786		0	26.1616
		0	75.784		0	0		0	0		41.5195	0
		0	0		0	0		0	0		0	82.7016
		0	0		0	23.5267		0	0		0	35.29
		0	45.6459		0	0		0	0		0	163.021
		0	0		0	0		0	0		59.9148	0
		0	0		0	0		0	0		0	63.4667
		0	34.0889		0	21.0549		0	0		0	56.1464
		0	54.1411		0	0		0	0		0	185.484
		0	137.024		0	0		0	87.7287		0	152.899
		0	0		0	53.6497		0	11.7054		0	0
		0	37.6179		0	32.9156		0	3.91853		0	35.2667
		0	0		0	0		0	64.9233		0	0
		0	0		0	0		0	0		0	91.7581
		0	51.9032		0	0		0	0		0	36.4945
		0	23.0871		0	0		0	37.2945		0	29.3028
		0	0		0	0		0	0		0	0
		0	108.814		0	0		0	0		0	83.5084
		0	0		0	0		0	89.0784		0	0
		0	43.9755		0	0		0	0		62.6536	0
		0	0		0	0		0	0		0	0
		0	0		0	0		0	0		0	148.249
		0	0		0	0		0	39.0413		0	29.281
		0	21.7806		0	9.1338		0	36.5352		45.0556	0
		0	48.113		0	0		0	0		0	0
		0	0		0	0		0	0		0	0
		87.836	78.1879		0	0		0	0		0	30.5562
		0	33.6874		0	0		0	0		0	171.724
		0	33.9682		0	0		0	0		0	129.553
		0	123.986		0	0		0	0		0	0
		0	40.6264		0	0		0	37.918		0	28.8899
		0	47.5239		0	0		0	0		0	0
		0	82.7247		0	0		0	0		0	75.5932
		0	51.1158		0	0		0	0		0	0
		0	42.955		0	0		0	0		32.3947	21.4775
		0	203.105		0	0		0	0		0	82.3039
		0	100.146		0	0		0	56.446		0	172.98
		0	0		0	43.9344		0	0		0	69.1732
		0	39.3224		0	0		0	0		0	46.8123
		0	45.6125		0	0		0	0		0	0
		0	0		0	0		0	63.7294		0	72.8335
		0	40.9001		0	0		0	58.8562		0	0
		0	0		0	0		0	24.0117		33.5463	0
		0	97.8224		0	46.2433		0	0		0	0
		0	0		0	0		0	0		0	46.3083
		0	0		0	0		54.8521	0		0	0
		21.1858	0		0	70.458		0	0		0	83.6688
		0	0		0	0		0	0		0	39.9537
		0	0		0	0		0	0		0	36.1152
		0	95.5089		0	0		0	0		0	0
		0	0		0	0		0	42.2947		0	0
		0	0		0	0		0	0		0	28.3173
		0	45.3135		0	0		0	0		0	51.9447
		0	0		0	0		0	0		0	0
		0	114.567		0	0		0	59.4049		0	0
		0	23.9616		0	0		50.6435	0		0	91.8529
		0	67.0015		25.0345	0		0	0		0	117.017
		0	29.3793		0	0		0	0		0	88.1378
		0	43.4564		0	0		0	0		0	30.4195
		0	0		0	0		0	0		0	0
		0	42.6378		0	0		0	0		105.756	42.6378
		0	66.7962		0	0		0	0		0	93.0767
		0	0		0	92.0927		0	0		0	132.573
		0	0		0	0		0	0		0	147.695
		36.9773	3.88775		0	51.3183		0	0		0	0
		0	0		0	0		0	0		0	95.3947
		0	0		0	41.6714		0	0		0	87.0469
		0	45.05		0	0		0	0		0	120.642
		0	92.641		0	0		0	47.7531		0	0
		0	77.281		0	20.296		0	30.444		0	0
		0	0		0	0		0	14.976		0	0
		0	92.8573		0	0		0	0		0	0
		0	64.7863		0	0		0	0		0	0
		0	38.0738		0	0		0	0		0	62.4801
		0	66.0734		0	33.0367		0	0		0	77.0856
		0	55.3032		0	0		0	49.7729		0	230.43
		0	0		0	0		0	0		0	0
		0	57.6746		0	0		0	0		0	0
		0	0		0	29.142		0	0		0	0
		0	0		0	0		0	0		0	0
		0	0		0	0		0	0		0	83.556
		0	0		0	0		0	0		0	0
		0	62.9398		0	0		0	30.1766		64.8348	0
		0	119.242		0	0		0	0		0	141.708
		0	145.964		0	0		0	0		0	74.2051
		0	52.3656		0	0		0	33.4796		0	33.4796
		0	57.4741		0	0		0	0		0	0
		0	0		0	0		0	0		0	33.7971
		0	54.1939		0	0		0	0		0	0
		52.0722	0		0	0		0	0		0	132.906
		0	51.1113		0	0		0	40.5033		0	0
		0	0		0	0		0	0		0	65.2331
		0	0		0	33.6254		0	0		0	124.155
		0	0		14.6679	0		0	19.6094		0	162.642
		0	96.6588		82.3567	49.3362		0	12.0823		63.4552	174.187
		0	136.84		0	49.1016		0	0		0	33.8076
		0	32.368		0	0		0	0		26.9743	0
		0	49.4292		0	0		0	0		0	140.199
		0	0		0	0		0	0		0	0
		0	78.1643		0	54.715		0	0		0	78.1643
		40.5169	175.979		0	43.757		0	39.952		0	22.8297
		0	129.279		0	41.2424		0	31.7249		0	48.3805
		0	28.1762		0	0		0	0		14.923	122.097
		0	76.3777		0	21.216		0	0		0	113.859
		0	0		0	27.133		0	27.133		0	129.087
		0	0		0	99.9131		0	53.2146		0	114.031
		0	0		0	0		0	0		0	89.9475
		0	0		0	28.783		0	0		0	0
		0	25.9536		0	0		0	0		0	0
		0	0		0	0		0	0		0	0
		0	79.7208		0	0		0	34.2885		0	45.4323
		0	16.0795		0	0		0	0		0	65.2114
		0	47.5239		0	0		0	0		0	105.519
		0	40.4115		0	0		0	0		0	320.867
		0	85.9543		0	0		0	0		0	159.859
		0	40.242		0	0		0	0		0	64.1956
		0	70.3917		0	0		0	0		0	0
		0	64.2758		0	0		0	0		0	66.2844
		0	122.547		0	0		0	0		0	0
		0	0		0	0		0	0		0	110.099
		0	75.4978		0	0		0	0		0	0
		0	59.4049		6.2139	42.326		0	0		0	17.8215
		0	0		0	0		0	0		0	0
		0	31.839		0	0		0	0		0	125.68
		0	54.1607		0	0		0	0		0	0
		0	0		0	0		0	0		0	0
		0	54.751		0	42.7058		0	0		0	47.0859
		0	0		0	0		0	0		0	64.0459
		0	50.5573		0	0		0	0		0	98.1979
		0	0		0	0		0	0		0	0
		0	77.0063		0	0		0	0		0	0
		0	42.6067		0	0		0	0		0	90.1026
		0	0		0	0		0	0		0	99.8507
		0	34.3737		0	0		71.6113	35.2551		0	0
		0	45.696		0	0		0	29.8782		0	63.2715
		0	97.208		0	29.7024		0	23.4019		0	0
		0	0		0	35.7054		0	0		0	61.5918
		0	75.4192		0	0		0	0		0	284.046
		0	110.267		0	0		0	0		0	34.7687
		0	0		0	0		0	0		0	0
		0	0		0	0		0	0		0	52.1648
		0	51.2553		0	0		0	0		0	0
		0	85.0851		0	0		0	0		0	0
		0	0		0	64.773		0	0		0	33.7175
		0	0		0	55.8878		0	85.7588		0	172.481
		0	120.433		0	0		0	0		0	173.389
		0	0		0	0		0	0		65.7722	0
		0	59.9671		0	199.89		0	0		0	31.2328
		0	67.6811		0	28.6909		56.9065	0		0	0
		0	31.669		0	0		0	0		0	191.035
		0	0		0	0		0	0		0	0
		0	34.1301		0	0		0	75.6397		0	52.5788
		0	53.6196		0	0		0	0		0	24.4581
		0	0		0	0		0	12.7877		76.3357	95.3268
		0	0		0	0		0	0		0	171.762
		40.4349	0		0	0		0	0		0	73.409
		0	0		0	0		0	0		0	0
		0	5.25242		0	75.6348		0	0		0	97.695
		0	125.187		0	0		0	0		0	23.6202
		0	27.0214		0	30.3991		0	0		0	95.4193
		0	55.7699		0	40.8315		0	0		0	0
		0	0		0	44.629		0	0		0	95.289
		0	0		0	39.7623		0	0		0	108.949
		0	0		0	93.8922		0	20.7646		0	75.836
		0	0		0	0		0	30.412		0	79.0713
		0	0		0	0		0	43.2995		0	0
		0	53.4082		0	0		0	0		0	47.7862
		0	0		0	0		0	0		0	31.3689
		0	0		0	45.1708		0	0		0	0
		0	0		0	0		0	0		0	0
		0	42.3951		0	0		26.329	0		0	5.17014
		0	0		0	0		0	0		0	0
		0	133.627		0	0		0	0		0	114.537
		0	94.6691		0	0		0	0		0	0
		0	50.7557		0	63.1856		0	0		56.5104	76.6514
		0	0		0	0		0	0		0	0
		0	0		0	37.5278		0	0		0	75.9086
		0	44.7089		0	95.2134		0	0		0	52.1604
		0	66.9351		0	0		0	0		0	0
		0	0		0	0		0	0		0	51.3108
		0	27.9918		0	0		0	0		0	96.4163
		0	86.5546		0	58.8301		0	0		0	58.1539
		0	0		0	53.2362		0	0		0	72.6717
		69.8076	0		0	104.873		0	0		0	0
		0	41.3906		0	0		0	0		0	23.5174
		0	0		0	0		0	0		0	109.177
		0	72.6059		0	0		0	27.2272		0	85.807
		0	0		0	0		0	58.8853		0	30.02
		80.334	0		0	0		0	0		0	0
		0	36.9083		0	0		0	0		0	97.5435
		0	0		0	0		0	0		0	62.9855
		0	87.3721		0	0		0	31.0293		0	0
		0	80.6275		0	0		0	0		0	0
		0	40.9689		0	41.9216		0	81.9377		0	33.3468
		0	0		0	0		0	0		0	66.7357
		0	48.6248		0	31.1933		0	33.9456		0	154.132
		0	56.7295		0	0		0	18.0503		0	113.459
		0	78.5456		0	56.4308		0	29.7406		0	176.156
		0	77.3445		0	0		0	0		0	0
		0	39.9506		0	0		0	0		0	78.1643
		0	49.6632		0	0		0	0		0	0
		0	77.0991		0	30.8396		0	0		0	0
		0	0		0	0		0	0		0	84.2344
		0	0		0	0		0	76.2566		0	0
		0	0		0	48.4071		0	62.8443		0	0
		0	123.17		0	18.3608		0	0		0	51.2573
		0	124.57		0	36.723		0	0		0	90.7274
		0	0		0	93.088		0	0		0	49.8103
		0	124.949		0	0		0	0		0	0
		0	56.7841		0	0		0	0		0	0
		0	0		0	0		0	0		0	53.5179
		0	0		0	0		0	0		0	44.2953
		0	0		0	0		0	0		0	14.3144
		0	41.3971		0	0		0	0		0	60.0258
		0	50.0134		0	46.6792		0	0		55.7792	0
		0	39.9537		0	0		0	0		0	79.9074
		0	42.9543		0	25.5898		0	0		0	95.0478
		0	78.1379		0	0		0	48.0849		0	0
		0	0		0	0		0	0		0	0
		0	0		0	43.5599		0	0		0	47.9159
		0	0		0	22.2576		0	36.8402		0	0
		0	59.047		0	0		0	51.8898		0	35.7861
		0	38.6822		0	0		0	0		0	14.3677
		0	40.8257		0	41.5177		0	18.683		0	87.8791
		0	11.8023		0	0		0	23.6046		0	68.8467
		0	0		0	0		0	56.0118		0	0
		64.6408	34.9184		0	86.4229		0	0		0	80.3122
		0	0		0	19.4909		0	11.864		0	0
		0	25.2945		0	0		0	0		0	104.154
		0	20.7917		0	0		0	25.7421		0	131.681
		0	0		0	0		0	0		0	0
		0	0		0	0		0	0		0	0
		0	50.5573		0	0		0	0		0	0
		0	68.5255		0	0		0	0		0	69.4907
		0	0		0	77.409		0	26.0929		0	33.051
		0	62.0822		0	0		0	0		0	41.1294
		0	33.4427		0	0		0	0		0	0
		0	0		0	0		0	0		0	0
		0	0		0	0		0	0		0	60.2576
		59.2567	55.1394		0	0		0	0		0	0
		0	77.7098		0	0		0	31.9474		0	0
		0	0		0	0		0	0		0	135.783
		0	0		0	0		0	0		0	38.0529
		0	50.3985		0	0		0	0		0	66.2647
		0	99.4142		0	0		0	0		0	0
		0	0		0	0		0	0		0	33.4541
		0	111.316		0	0		0	0		0	102.585
		0	58.6833		0	61.5694		0	0		0	70.2276
		0	0		0	0		0	0		27.3031	0
		0	0		0	17.5457		0	0		0	0
		0	0		0	0		0	25.6584		0	0
		0	51.6163		0	23.043		0	0		0	0
		0	0		0	0		0	0		42.655	19.645
		0	9.17128		0	49.1914		0	25.0126		0	0
		0	38.7585		0	0		0	0		0	68.5727
		0	0		0	0		0	32.495		0	0
		0	17.705		0	0		0	27.9552		0	0
		0	52.751		0	0		0	0		0	0
		0	76.3146		0	0		0	0		0	55.4285
		0	35.2153		0	0		0	47.7922		0	80.4921
		0	71.8778		0	33.8248		0	47.3548		0	57.5022
		100.943	45.1826		0	0		0	0		0	0
		0	0		0	0		0	0		0	0
		0	77.9713		0	35.5117		0	0		0	0
		44.9109	0		0	0		0	46.949		0	0
		0	0		0	0		0	0		36.5007	165.815
		0	0		0	0		0	0		0	4.08281
		0	31.343		0	0		0	53.8709		0	0
		0	83.0075		0	78.8152		0	33.5384		0	152.6
		0	0		0	0		0	87.4049		0	142.287
		0	64.9529		0	0		0	0		0	46.0083
		0	31.4116		0	0		0	22.1729		0	45.2696
		0	32.708		0	0		0	42.432		0	125.528
		0	0		0	0		0	0		0	64.4392
		0	85.3136		0	80.4186		0	0		0	0
		0	108.084		0	0		0	0		0	60.6936
		0	43.2995		0	0		0	0		0	121.45
		0	43.5906		0	107.456		0	0		0	0
		0	0		0	0		0	0		0	0
		0	35.2096		0	0		0	46.9461		0	31.5983
		0	0		0	0		0	0		0	0
		0	0		0	0		0	0		0	199.836
		0	23.3312		0	59.2254		0	47.5598		0	0
		0	0		0	0		0	0		0	70.9009
		0	0		0	0		0	34.3518		0	0
		0	0		0	0		0	0		0	0
		0	36.2778		0	0		0	30.2315		0	93.7176
		0	135.428		0	0		0	45.5368		0	0
		0	35.1932		0	30.6311		76.0904	0		0	0
		0	0		0	0		0	0		0	0
		0	0		0	0		0	0		0	91.9817
		0	148.735		0	0		0	0		0	97.969
		0	0		0	36.7013		0	0		0	0
		0	27.1393		0	0		0	0		0	29.1496
		0	0		0	0		0	0		0	0
		0	0		0	0		0	0		0	65.765
		0	41.0592		0	47.1745		0	0		41.1408	0
		0	39.4836		0	0		0	61.9175		35.1162	0
		0	35.3545		0	0		0	0		0	67.9178
		0	0		0	41.1264		0	47.9809		0	171.36
		0	0		0	159.657		0	105.747		0	0
		0	0		0	0		0	0		0	0
		0	40.3669		0	0		0	0		0	192.016
		0	0		0	0		0	0		0	85.2993
		0	0		0	5.75071		0	0		0	0
		0	21.374		0	0		0	38.3257		0	62.6478
		0	0		0	0		0	42.369		0	135.934
		0	71.7769		0	0		0	0		0	35.8885
		0	0		0	0		0	37.3094		0	142.605
		0	0		0	38.0853		0	0		0	33.9456
		0	24.7359		0	0		0	17.7789		0	98.9437
		0	37.0179		0	0		0	0		0	130.444
		0	59.8322		0	22.4371		0	0		0	174.155
		0	87.9251		0	0		0	3.69433		0	186.194
		91.0137	26.3613		0	47.8182		0	69.275		0	47.2051
		44.7494	40.9124		0	35.1847		0	72.8241		0	54.0044
		0	43.4311		0	36.0699		0	0		0	92.015
		0	0		0	34.6139		0	0		0	0
		0	0		0	0		0	40.7246		0	71.7108
		0	43.5555		0	30.6502		0	23.3909		0	97.5966
		0	0		0	0		0	0		0	78.4929
		0	44.1057		0	0		0	0		0	74.4284
		0	56.7504		0	0		0	0		0	58.5811
		0	0		0	0		0	59.2814		62.9637	138.323
		0	0		0	0		0	0		0	96.1589
		0	0		0	0		0	0		24.6493	0
		0	72.8447		0	0		0	0		0	37.8792
		0	0		0	0		0	49.9916		0	60.6281
		0	71.7926		0	0		0	0		0	18.3001
		0	0		0	52.613		0	0		0	0
		0	47.9194		0	0		0	0		0	0
		0	0		0	0		0	0		0	0
		0	64.0424		0	0		0	50.7923		0	0
		0	0		0	0		0	0		0	0
		0	30.0573		0	41.7462		0	0		0	78.4829
		0	0		0	0		0	25.2416		0	41.7792
		0	111.356		0	0		0	32.3292		0	124.827
		0	0		0	42.2309		0	0		0	48.8002
		0	73.1554		0	0		0	0		44.2519	43.3513
		0	60.9281		0	0		0	0		0	62.3128
		67.8267	56.9636		0	35.6805		0	47.574		0	0
		0	0		0	0		0	0		0	0
		0	75.2462		0	0		0	0		0	60.989
		0	0		0	14.8822		0	56.2217		0	0
		0	0		0	0		0	10.7764		0	0
		0	0		0	0		0	41.1462		0	101.151
		0	0		0	4.37122		0	0		0	97.0411
		0	0		0	0		0	0		0	0
		0	0		0	0		0	0		0	0
		35.2355	58.0175		0	46.6662		0	0		0	0
		0	0		0	0		0	0		0	70.8991
		0	55.8666		0	0		0	0		0	0
		0	0		0	0		0	0		0	0
		0	98.8291		0	0		0	0		0	49.4145
		0	0		0	0		0	0		0	181.495
		0	84.3427		0	34.8725		0	0		0	30.0066
		0	0		0	0		0	0		0	0
		0	42.7641		0	0		0	0		0	79.9502
		0	31.933		0	0		0	0		0	39.4467
		0	113.152		0	0		0	0		0	129.551
		0	62.7577		0	0		0	0		0	0
		0	0		0	0		0	51.9032		0	0
		0	58.8309		0	18.6537		0	29.4155		33.3557	140.62
		0	25.3717		0	0		0	78.7399		0	162.729
		0	64.5795		0	38.0853		0	44.7089		0	0
		0	0		0	0		0	90.4782		0	0
		0	0		0	0		0	27.3227		0	52.0013
		0	0		0	0		0	0		0	84.7234
		0	178.823		0	17.167		0	50.0703		0	105.148
		52.5897	41.7032		0	46.1397		0	0		0	0
		0	117.911		0	0		0	0		0	126.895
		0	89.4448		0	67.5055		0	0		0	0
		0	36.864		0	0		0	0		0	124.416
		0	0		0	39.0375		0	21.216		0	39.0375
		0	47.4626		0	35.9797		0	0		0	47.4626
		0	94.0884		0	0		0	22.1385		0	73.7949
		0	93.2162		0	0		0	0		0	35.1605
		0	0		0	0		0	71.8331		0	0
		0	0		0	0		0	0		0	154.776
		0	66.4851		0	0		0	0		0	0
		0	62.487		0	31.2435		0	36.31		0	78.5309
		0	33.8076		0	0		0	40.5692		0	76.3087
		0	0		0	0		0	39.0628		30.5905	85.4958
		0	42.432		0	0		0	0		0	0
		0	0		0	0		0	0		0	0
		49.6294	20.4955		0	0		0	0		0	0
		0	0		0	0		0	28.2567		0	0
		0	44.0036		0	0		74.4284	0		0	16.6236
		0	0		59.3307	0		0	18.6661		0	0
		0	0		0	0		0	0		0	0
		0	0		0	0		0	0		0	60.1306
		0	35.7591		0	0		0	0		0	0
		0	35.2103		0	0		0	27.1623		0	90.5409
		0	0		0	0		0	0		0	0
		0	67.4722		0	0		0	32.2693		0	185.793
		0	48.2476		0	0		0	0		0	23.1186
		0	40.6187		0	0		0	0		0	0
		0	0		0	0		0	0		0	0
		0	27.9674		0	53.8632		0	0		0	0
		0	69.4099		0	23.1366		0	0		0	0
		0	35.5672		0	109.729		0	0		0	52.9725
		0	0		0	0		0	0		0	7.36234
		0	54.0044		0	0		0	0		0	0
		0	11.322		0	0		0	60.8555		0	31.1354
		0	29.2869		0	0		0	0		0	0
		0	88.4753		0	0		0	34.5919		0	70.5142
		0	50.067		0	34.9674		0	34.9674		0	34.1727
		0	56.7153		0	0		0	0		40.3407	77.7642
		0	93.1211		0	21.1931		0	20.5509		0	0
		0	77.0824		0	0		0	0		0	0
		0	43.3349		0	0		0	20.7646		0	81.2528
		0	0		0	0		0	0		0	78.4687
		0	0		0	0		0	0		0	0
		0	26.8431		0	47.2671		0	0		0	0
		0	143.24		0	0		0	0		0	56.2413
		0	32.1651		0	20.7733		0	0		0	40.8764
		0	56.8662		0	0		0	0		30.464	153.336
		0	0		0	0		0	0		0	72.6431
		0	0		0	0		0	0		0	0
		0	0		0	26.4862		0	0		43.7784	98.3775
		0	87.161		0	0		0	0		0	40.6187
		0	0		0	0		0	21.0516		0	72.3647
		0	0		0	0		0	0		0	0
		93.1521	30.0915		0	0		0	59.1455		0	62.2584
		0	40.5229		0	56.9045		0	0		0	135.364
		0	170.568		0	0		0	30.2486		0	0
		0	77.3459		0	18.3398		0	0		0	115.62
		0	102.422		0	0		0	49.3144		0	139.598
		0	21.2464		0	0		0	33.9942		0	0
		0	0		0	0		0	36.1097		103.697	0
		0	30.1147		0	60.9464		0	0		0	97.5143
		0	35.2551		0	0		0	0		0	81.9681
		0	0		0	0		0	31.9999		0	78.7689
		0	82.6367		0	48.3347		0	40.5388		0	69.3836
		0	0		0	0		0	0		0	0
		0	0		0	0		0	76.9973		0	35.0874
		6.56407	53.3327		0	30.2004		59.0767	39.1963		0	141.364
		0	130.904		0	33.4375		65.8619	56.9148		0	141.576
		0	140.744		0	0		0	0		0	0
		0	0		0	0		0	0		0	0
		0	34.2098		0	0		0	0		0	0
		0	113.189		0	0		0	0		0	34.3471
		0	0		0	47.5644		0	0		0	0
		0	0		0	0		0	0		0	0
		0	0		0	0		0	0		0	97.517
		0	31.4515		0	89.8615		0	55.8425		0	125.806
		0	50.9118		0	0		0	0		0	0
		0	0		0	0		0	35.0399		0	0
		0	0		0	0		0	0		0	0
		0	0		0	37.8769		0	34.7849		0	126.772
		0	0		0	49.7553		0	0		0	142.481
		0	0		46.8588	50.4714		0	0		0	18.1697
		0	0		0	0		0	0		0	28.6416
		0	43.2035		0	0		0	0		0	50.6811
		0	0		0	42.9035		0	0		0	89.9324
		0	0		0	64.2006		0	0		0	143.871
		0	33.3692		0	0		0	0		0	0
		0	0		0	0		0	40.8584		0	36.8526
		0	58.3832		0	0		0	0		0	115.793
		0	0		0	25.973		0	19.9792		0	148.512
		0	0		0	0		0	0		0	63.9236
		0	23.429		0	0		0	19.1131		0	0
		0	0		0	69.0754		0	0		0	0
		0	44.53		0	0		0	0		0	0
		0	52.6498		0	38.7423		0	0		0	42.7159
		0	144.81		0	0		0	0		0	0
		0	85.5644		0	0		0	0		0	0
		0	0		23.6718	0		0	0		0	0
		0	94.8671		0	32.5259		0	0		35.0151	0
		63.2279	0		0	0		0	0		0	0
		0	61.1673		0	0		0	0		0	111.967
		0	95.2193		0	0		0	0		0	0
		0	0		0	0		0	0		0	37.509
		0	0		0	0		0	0		0	99.2201
		0	38.367		0	65.2239		0	0		0	0
		0	39.11		0	51.7943		0	0		0	72.9348
		0	0		0	35.5579		0	39.4229		0	108.22
		0	36.6168		0	0		0	0		0	115.304
		73.3906	0		0	43.1535		0	0		0	0
		0	0		0	0		0	0		0	0
		0	0		0	0		0	0		0	115.161
		0	44.1609		82.7942	0		0	0		0	12.7387
		0	46.2263		0	0		0	45.4153		0	156.521
		0	104.42		0	0		0	0		0	0
		0	49.5445		0	0		0	42.7443		0	75.774
		0	53.4438		0	0		0	0		0	0
		0	61.0523		0	66.8668		0	0		0	104.661
		0	168.982		0	0		0	0		0	78.3935
		0	35.0586		0	0		0	22.5933		0	66.2218
		0	0		0	0		0	0		0	85.3084
		0	45.5929		0	0		0	10.7277		0	29.5013
		0	40.6004		0	42.025		0	146.731		0	18.5195
		0	48.2699		0	0		0	0		0	0
		0	0		0	0		0	0		0	0
		0	58.6289		0	37.9363		0	27.5901		0	43.9717
		0	0		0	0		0	0		0	0
		0	42.4618		0	57.4483		0	0		0	0
		0	0		0	0		0	18.3726		0	83.9892
		0	34.7539		0	0		0	0		0	0
		0	57.2339		0	46.3792		0	0		0	36.5113
		0	64.557		0	0		0	43.4518		0	194.292
		0	64.0503		0	0		0	39.4155		0	0
		0	0		0	59.5423		0	0		0	0
		0	0		0	0		0	0		0	0
		0	69.8134		0	0		0	110.432		0	6.34667
		0	83.6365		0	0		0	0		31.7378	43.5368
		0	31.0614		0	0		0	41.4152		0	95.1254
		0	51.3651		0	0		0	0		0	0
		89.6473	0		0	49.0809		0	0		0	68.5441
		0	73.4807		0	0		0	0		0	0
		0	22.848		0	34.272		0	0		0	78.4449
		0	41.641		0	0		0	0		0	23.9214
		0	0		0	0		0	0		0	0
		0	26.3854		0	0		0	0		38.2846	0
		0	36.5334		0	0		0	0		0	38.8168
		0	42.9543		0	63.0605		0	0		0	0
		0	150.28		0	27.404		0	35.36		0	28.288
		0	0		0	34.777		0	0		0	86.5877
		0	0		0	0		0	0		0	159.11
		0	37.8438		0	0		0	0		0	84.6507
		0	50.9779		0	0		0	0		0	0
		52.8043	0		53.9522	0		0	0		0	0
		0	118.048		0	0		0	0		0	118.048
		0	12.3393		0	55.5268		0	0		0	81.9681
		0	59.1151		0	0		0	47.5239		0	0
		0	0		0	0		0	0		0	0
		0	0		0	51.2111		0	0		0	64.8674
		0	0		0	40.4549		0	0		0	145.851
		0	0		6.24001	0		0	0		0	341.085
		0	131.09		0	72.3255		0	40.6831		0	0
		0	31.0614		0	0		0	112.597		0	0
		0	0		0	0		0	63.029		0	0
		0	93.1435		0	0		0	0		51.1981	0
		0	0		0	0		0	0		0	47.7689
		0	0		0	0		0	0		0	74.1959
		0	74.7628		0	0		0	0		0	29.725
		0	85.3568		0	18.106		0	0		0	0
		0	38.3795		0	0		0	23.3615		0	0
		0	87.118		0	0		0	0		0	124.846
		0	172.33		0	37.128		0	0		0	80.5608
		0	0		0	0		0	0		0	0
		0	91.8919		0	20.4204		0	28.7742		0	68.6869
		0	83.746		0	0		0	0		0	79.8326
		0	159.769		0	91.7943		0	37.7635		0	90.6324
		0	0		0	48.669		0	0		0	122.15
		0	84.9399		0	0		0	47.7787		0	53.0875
		0	6.39909		0	0		0	0		0	0
		0	63.1524		0	22.9014		0	0		0	0
		86.9339	0		0	0		0	0		0	0
		0	43.1684		0	0		0	0		0	68.2963
		0	0		0	16.38		0	0		0	42.588
		0	0		0	0		0	28.978		0	53.3805
		0	32.2378		0	39.6256		0	0		48.5205	57.7594
		0	0		0	22.8613		0	0		0	56.807
		0	104.879		0	0		0	0		0	68.0514
		0	35.5984		0	0		0	0		31.3881	0
		0	0		0	0		0	0		0	89.3103
		0	31.1876		0	0		0	0		0	0
		0	0		0	0		0	37.8876		0	75.0603
		0	0		0	0		0	119.544		0	58.7233
		0	39.4423		0	0		0	0		0	41.8571
		0	72.8646		0	68.8165		0	0		0	0
		0	40.4223		0	0		0	0		0	112.548
		0	42.3329		0	0		0	0		0	87.4417
		0	85.31		0	0		0	0		0	56.1797
		0	0		0	0		0	0		0	56.1768
		0	45.937		0	0		0	0		0	35.4968
		0	0		0	32.2102		0	0		0	0
		0	77.382		0	0		0	48.1278		0	33.0289
		88.3924	28.0051		54.5953	0		0	0		0	65.3453
		0	0		0	33.0027		0	0		0	101.614
		0	0		0	0		0	0		0	49.0949
		0	0		0	0		0	0		0	0
		0	0		0	0		0	0		0	0
		0			0			0			0
		0			0			0			0
		0			0			0			0
		0			0			0			0
		0			0			0			0
		0			0			0			0
		0			0			0			0
		0			0			0			0
		0			0			0			0
		0			0			0			0
		0			0			0			0
		0			0			0			0
		0			0			0			0
		0			0			0			0
		0			0			0			0
		0			0			0			0
		0			0			0			0
		0			0			0			0
		0			0			0			0
		0			0			0			0
		0			0			0			0
		0			0			0			0
		0			0			0			0
		0			32.086			0			0
		0			0			0			0
		0			0			0			0
		0			0			0			0
		0			0			0			0
		31.9725			0			0			42.2037
		0			0			0			0
		0			0			0			0
		0			0			0			0
		0			0			0			0
		0			0			0			0
		0			0			0			0
		0			0			0			0
		0			0			0			0
		0			0			0			0
		0			0			0			0
		0			0			0			0
		0			0			0			0
		0			0			0			0
		0			0			0			0
		0			0			0			0
		0			0			0			0
		0			0			0			0
		0			0			0			0
		89.5142			0			0			0
		0			0			0			0
		0			0			0			0
		0			0			0			0
		0			0			0			0
		0			0			0			0
		0			0			0			0
		0			0			0			0
		0			0			0			0
		0			0			0			0
		0			0			0			0
		0			0			0			0
		0			0			0			0
		0			0			0			0
		0			0			0			0
		0			0			0			0
		0			0			0			0
		0			0			0			0
		0			0			0			0
		0			0			0			0
		102.695			0			0			0
		0			0			0			0
		53.2345			0			0			0
		0			0			0			0
		0			0			0			0
		0			0			0			0
		0			0			0			0
		37.8375			0			0			0
		0			0			46.5253			0
		0			0			0			0
		0			0			0			0
		0			0			0			0
		0			0			0			0
		0			0			0			0
		0			0			0			0
		0			0			0			0
		0			0			0			0
		0			0			0			0
		0			0			0			0
		0			0			0			0
		0			0			0			0
		0			0			0			0
		0			0			0			0
		0			0			0			0
		0			0			0			0
		0			0			0			0
		0			0			54.0691			0
		0			0			0			0
		0			0			0			0
		0			0			0			0
		0			0			0			0
		0			0			0			0
		0			0			0			0
		0			0			0			0
		0			0			0			0
		0			0			0			0
		0			0			0			0
		91.9696			0			0			0
		0			0			0			0
		0			0			0			0
		0			0			0			0
		0			0			0			0
		0			0			0			0
[truncated: 304 more rows]
